# Supplementary material for: Dynamic Changes in Ezh2 Gene Occupancy Underlie Its Involvement in Neural Stem Cell Self-Renewal and Differentiation towards Oligodendrocytes
Source: PubMed Central journal article supplement (PMC3395718; doi:10.1371/journal.pone.0040399), 2012-07-12
Supplement: pone.0040399.s013.pdf [file pone.0040399.s013.pdf]

# FastQC Report

Wed 13 Jul 2011

ChIP-Seq IgG control.fastqsanger

## Summary

-  [Basic Statistics](#)
-  [Per base sequence quality](#)
-  [Per sequence quality scores](#)
-  [Per base sequence content](#)
-  [Per base GC content](#)
-  [Per sequence GC content](#)
-  [Per base N content](#)
-  [Sequence Length Distribution](#)
-  [Sequence Duplication Levels](#)
-  [Overrepresented sequences](#)
-  [Kmer Content](#)

## Basic Statistics

| Measure         | Value                            |
|-----------------|----------------------------------|
| Filename        | ChIP-Seq IgG control.fastqsanger |
| File type       | Conventional base calls          |
| Encoding        | Sanger / Illumina 1.9            |
| Total Sequences | 3740234                          |
| Sequence length | 60                               |
| %GC             | 44                               |

[Back to summary](#)

## Per base sequence quality

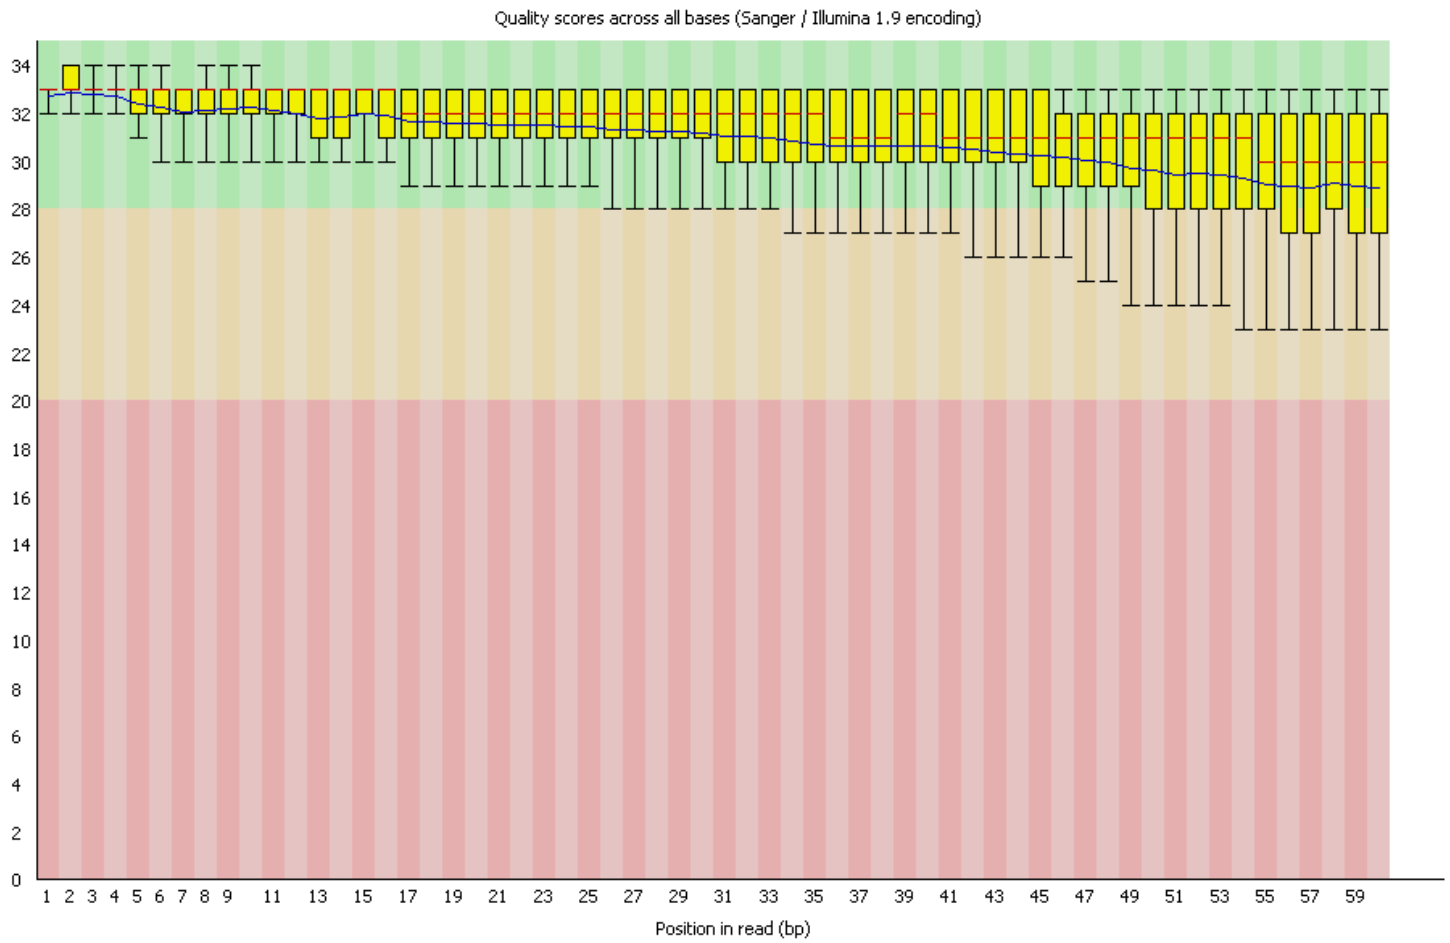

[Back to summary](#)

## Per sequence quality scores

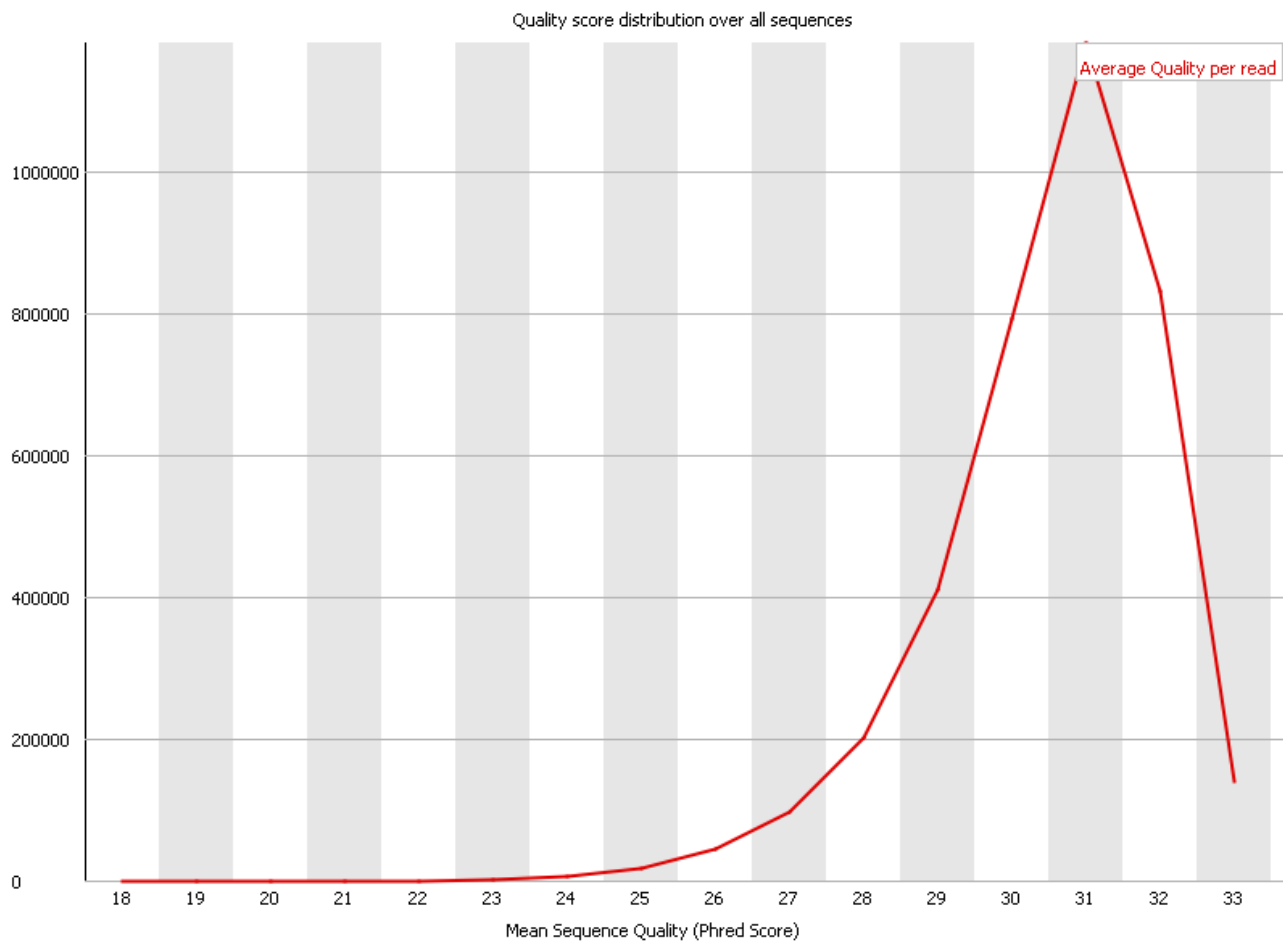

[Back to summary](#)

 Per base sequence content

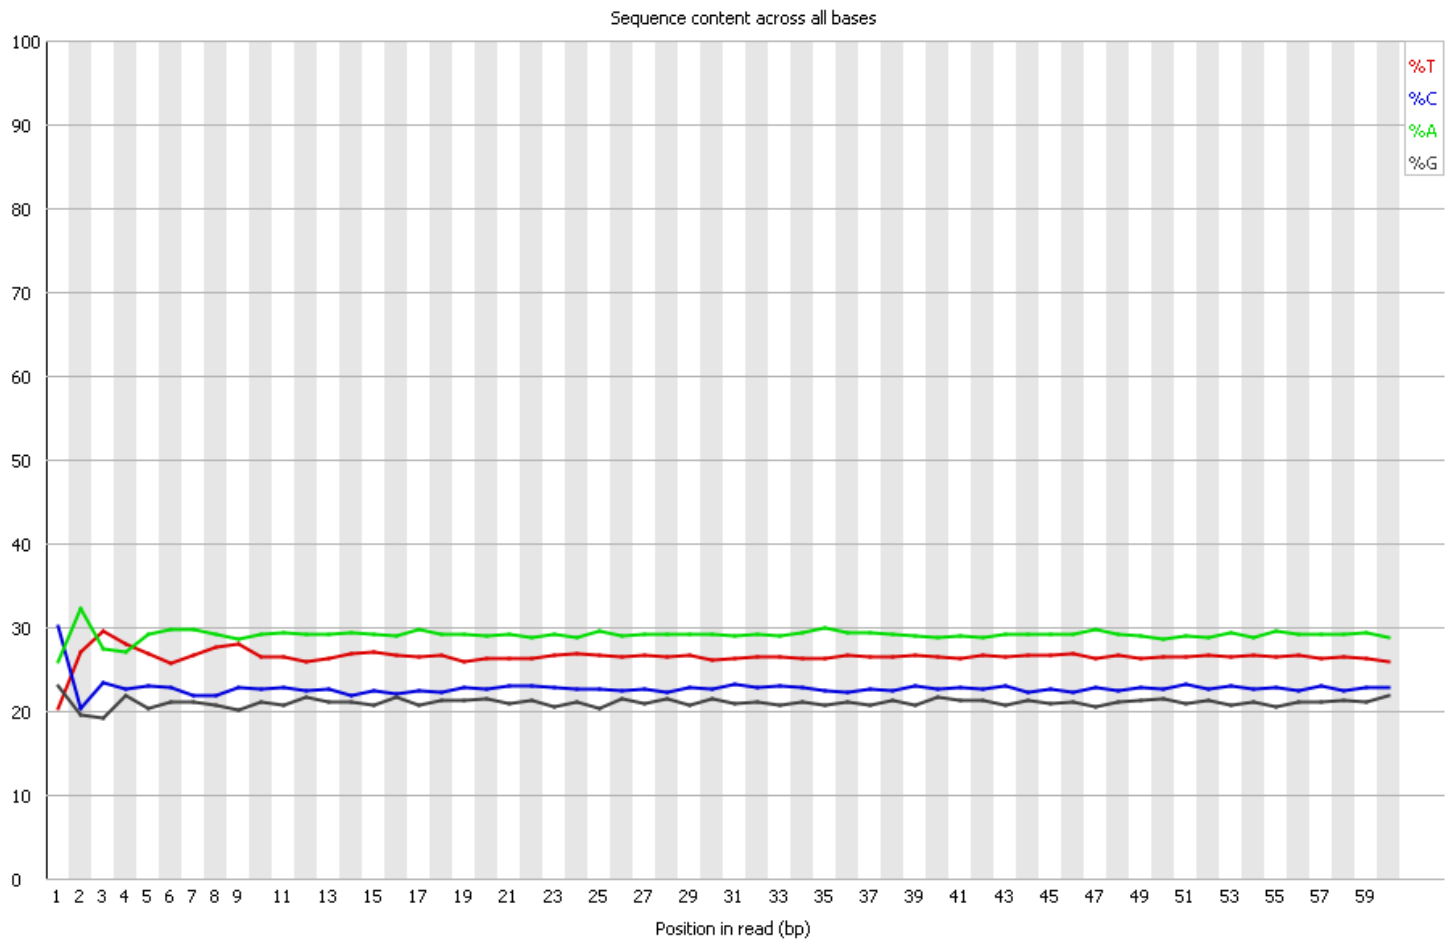

[Back to summary](#)

! Per base GC content

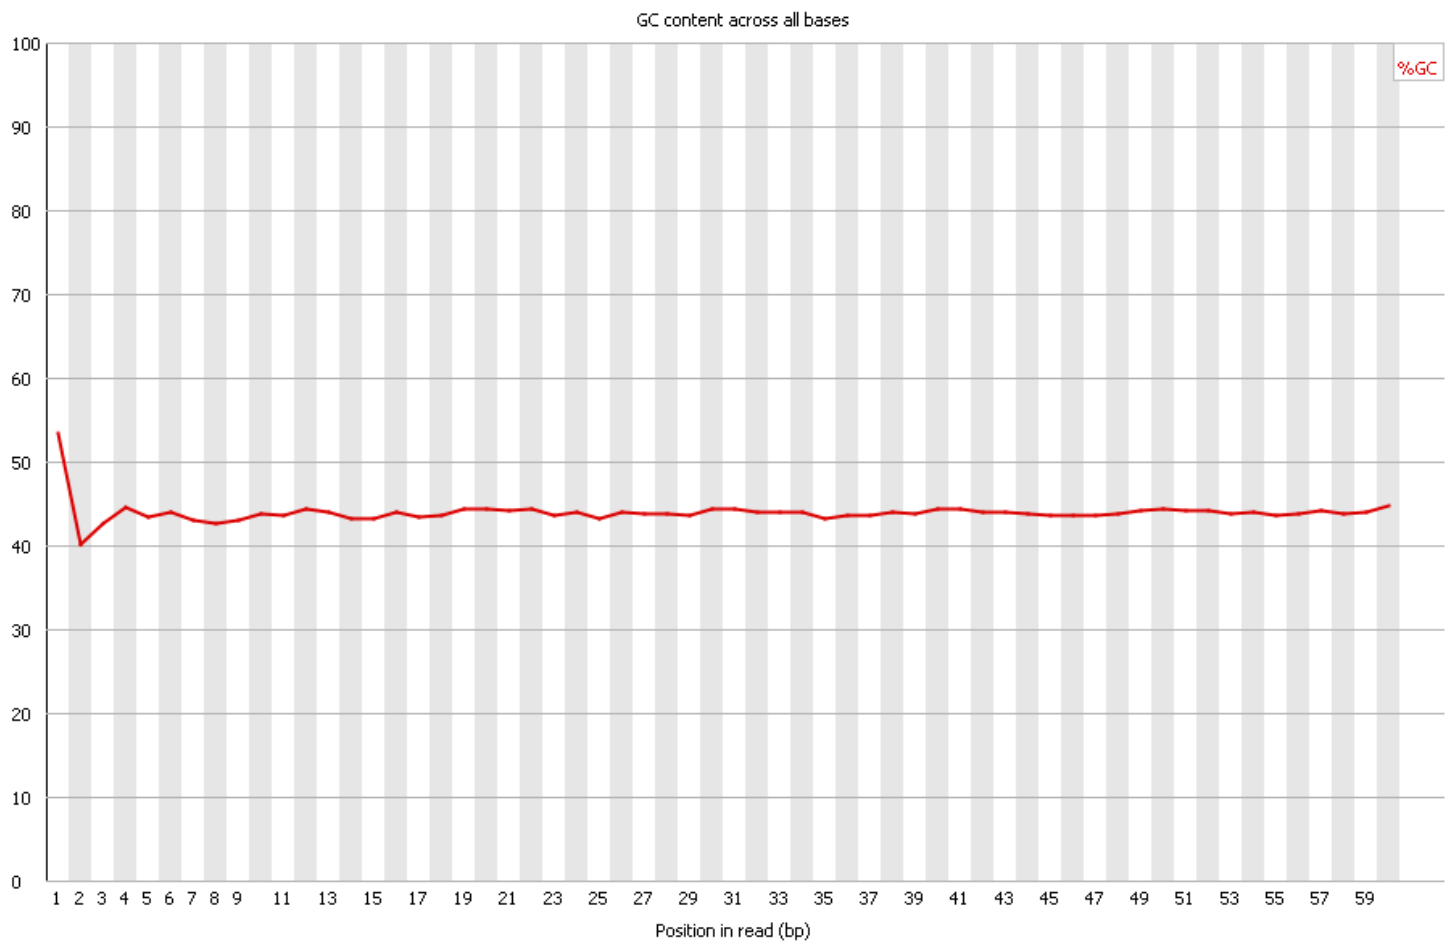

[Back to summary](#)

 Per sequence GC content

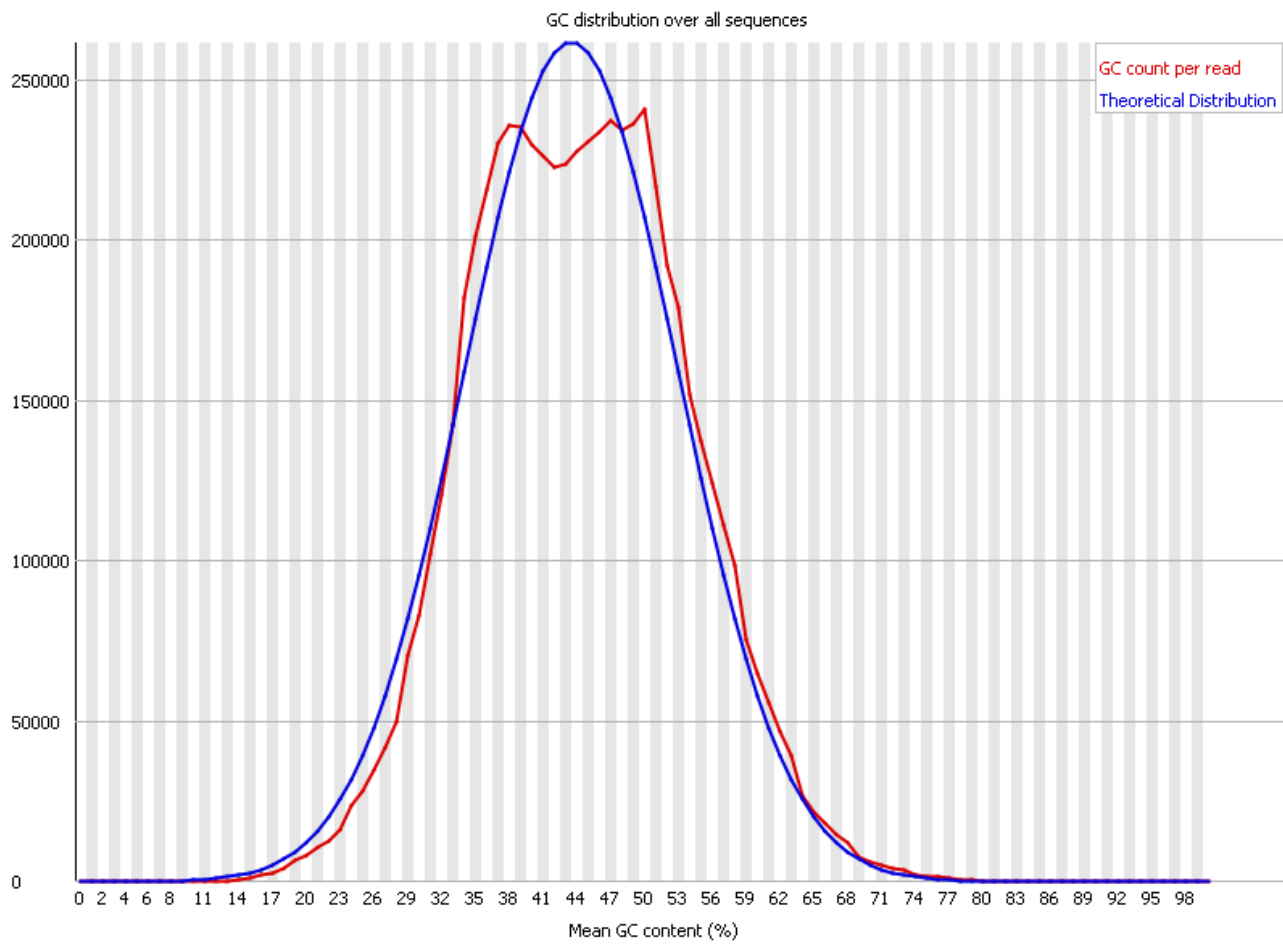

[Back to summary](#)

 Per base N content

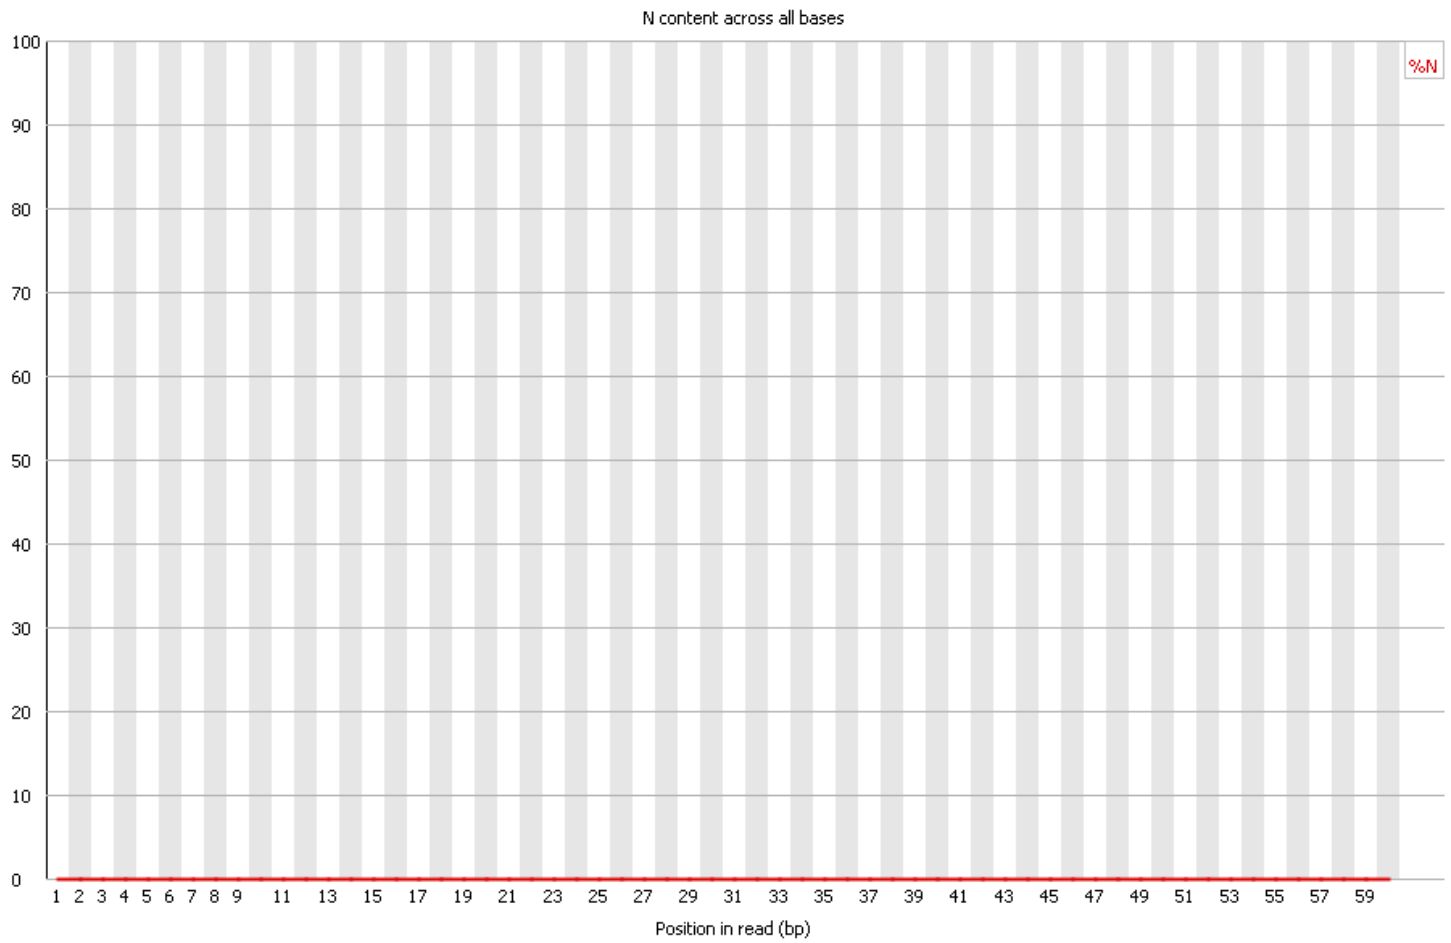

[Back to summary](#)

## Sequence Length Distribution

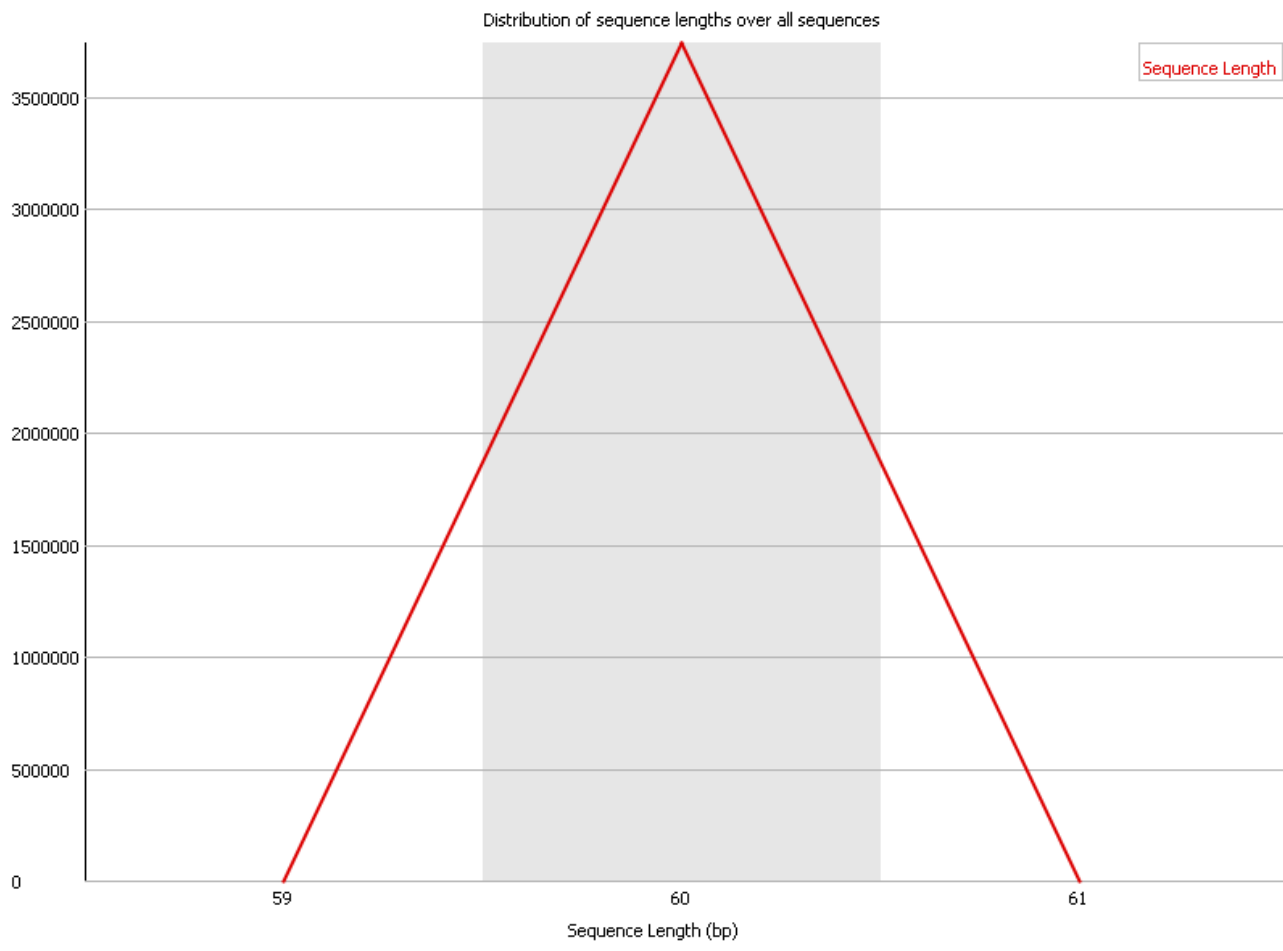

[Back to summary](#)

## Sequence Duplication Levels



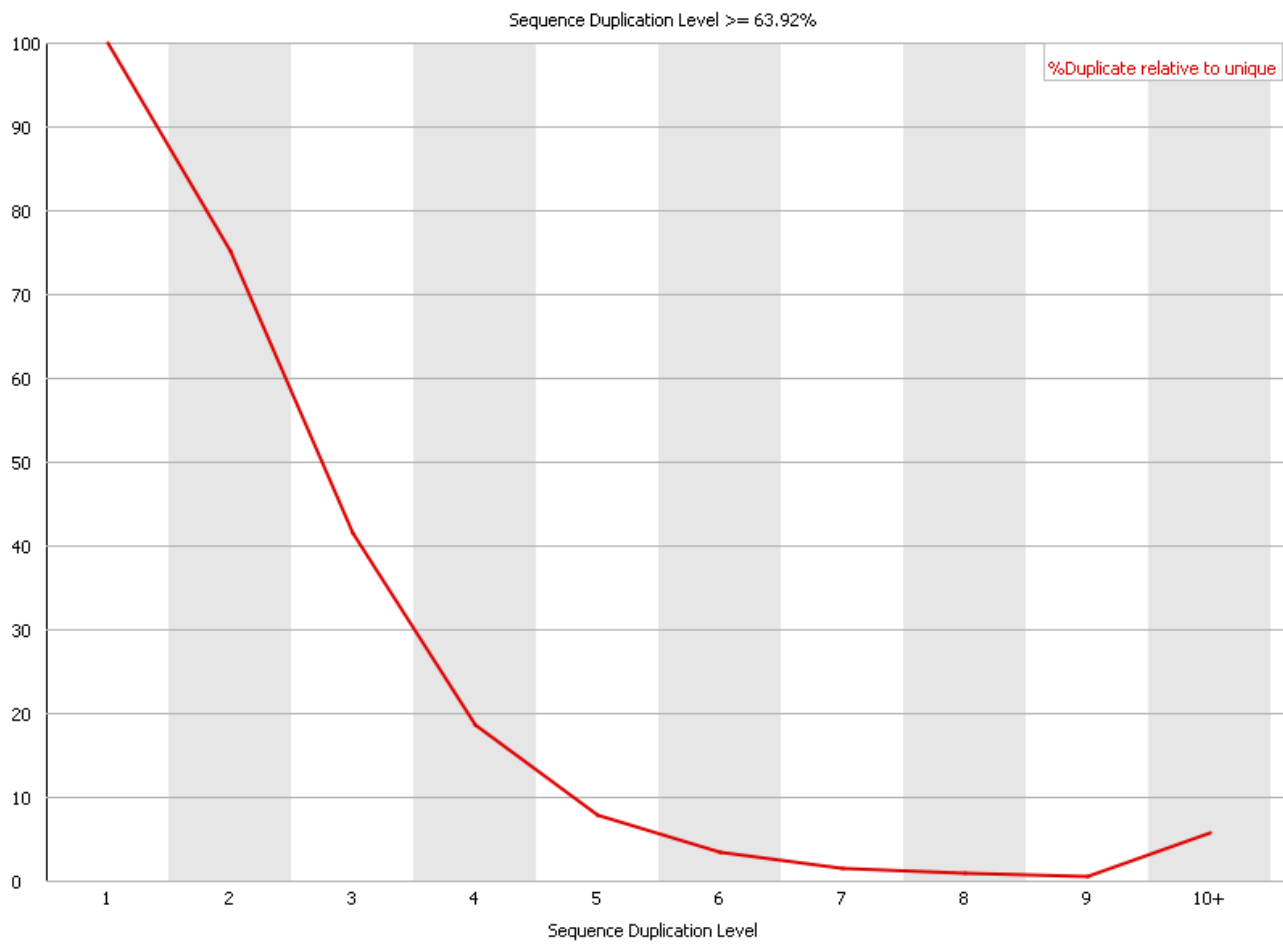

[Back to summary](#)

### Overrepresented sequences

No overrepresented sequences

[Back to summary](#)

### Kmer Content

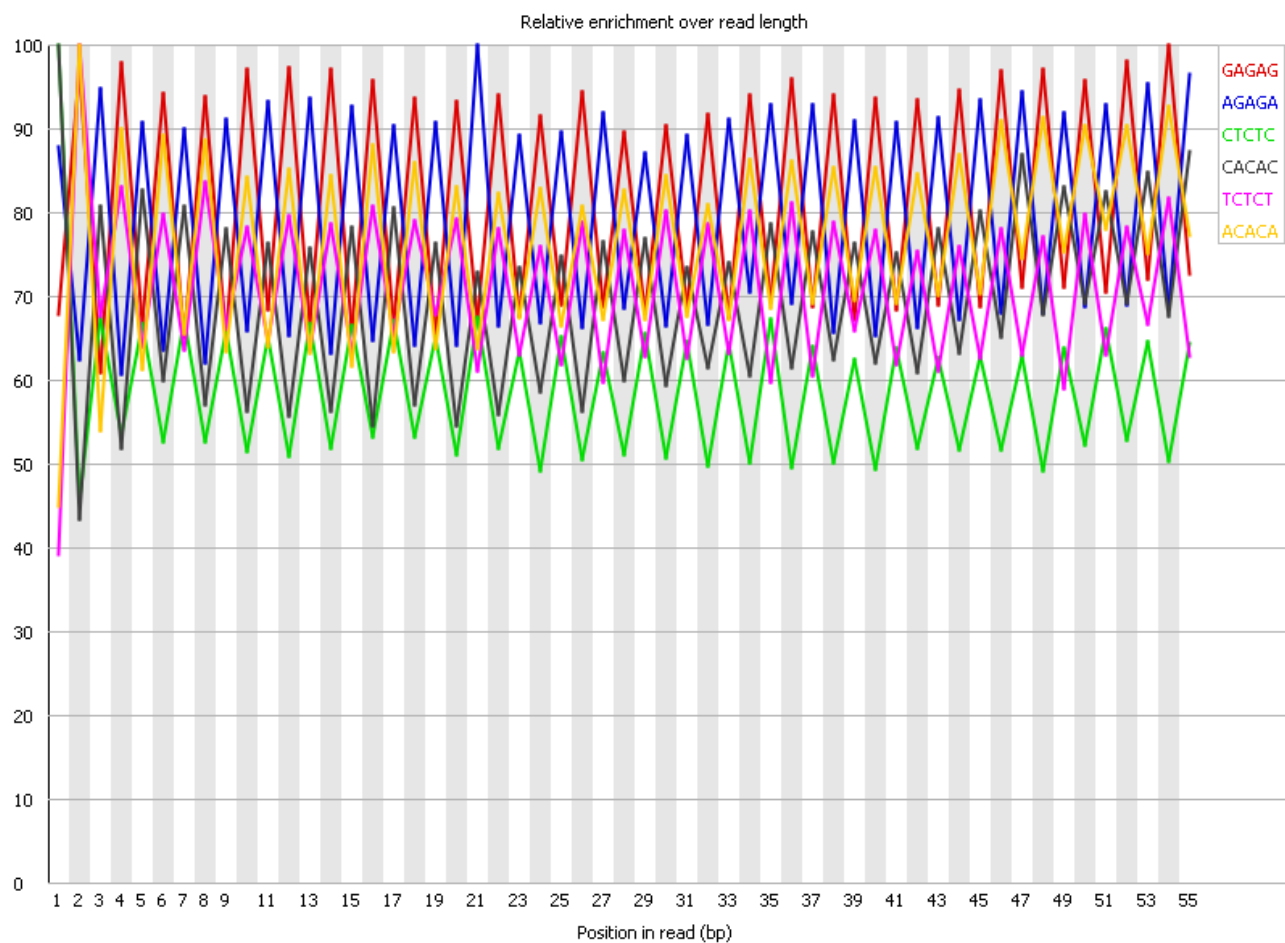

| Sequence | Count   | Obs/Exp Overall | Obs/Exp Max | Max Obs/Exp Position |
|----------|---------|-----------------|-------------|----------------------|
| GAGAG    | 1428690 | 8.5290985       | 10.483994   | 54                   |
| AGAGA    | 1546595 | 6.6827054       | 8.415197    | 21                   |
| CTCTC    | 816125  | 4.6517086       | 7.8920164   | 1                    |
| CACAC    | 888970  | 4.2003827       | 6.0200033   | 1                    |
| TCTCT    | 842050  | 4.124638        | 5.804397    | 2                    |
| ACACA    | 950610  | 3.5145457       | 4.581321    | 2                    |
| TTTTT    | 957515  | 3.4639993       | 5.1673374   | 42                   |
| GAGGG    | 375165  | 3.0944028       | 4.550071    | 1                    |
| GGGAG    | 368255  | 3.0374086       | 3.8401148   | 3                    |
| GGAGA    | 503550  | 3.0061297       | 3.587148    | 1                    |
| CTCTG    | 418740  | 2.5802083       | 5.3766656   | 22                   |

[Back to summary](#)
