# Supplementary material for: Dynamic Changes in Ezh2 Gene Occupancy Underlie Its Involvement in Neural Stem Cell Self-Renewal and Differentiation towards Oligodendrocytes
Source: PubMed Central journal article supplement (PMC3395718; doi:10.1371/journal.pone.0040399), 2012-07-12
Supplement: pone.0040399.s014.pdf [file pone.0040399.s014.pdf]

# FastQC Report

Wed 13 Jul 2011

ChIP-Seq-NSCs.fastqsanger

## Summary

-  [Basic Statistics](#)
-  [Per base sequence quality](#)
-  [Per sequence quality scores](#)
-  [Per base sequence content](#)
-  [Per base GC content](#)
-  [Per sequence GC content](#)
-  [Per base N content](#)
-  [Sequence Length Distribution](#)
-  [Sequence Duplication Levels](#)
-  [Overrepresented sequences](#)
-  [Kmer Content](#)

## Basic Statistics

| Measure         | Value                     |
|-----------------|---------------------------|
| Filename        | ChIP-Seq-NSCs.fastqsanger |
| File type       | Conventional base calls   |
| Encoding        | Sanger / Illumina 1.9     |
| Total Sequences | 5548680                   |
| Sequence length | 60                        |
| %GC             | 43                        |

[Back to summary](#)

## Per base sequence quality

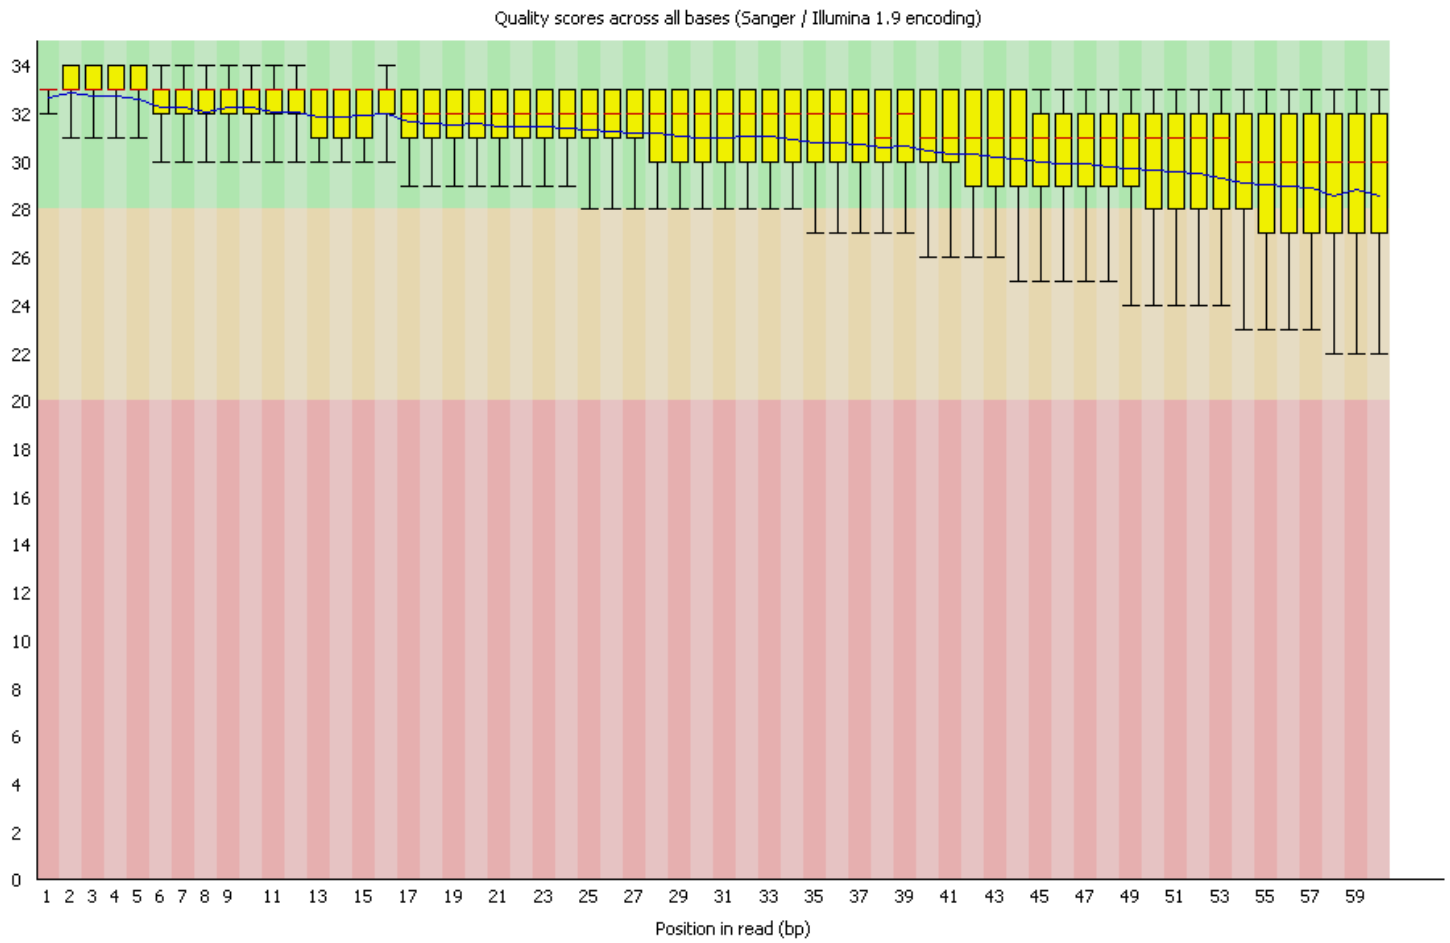

[Back to summary](#)

## Per sequence quality scores

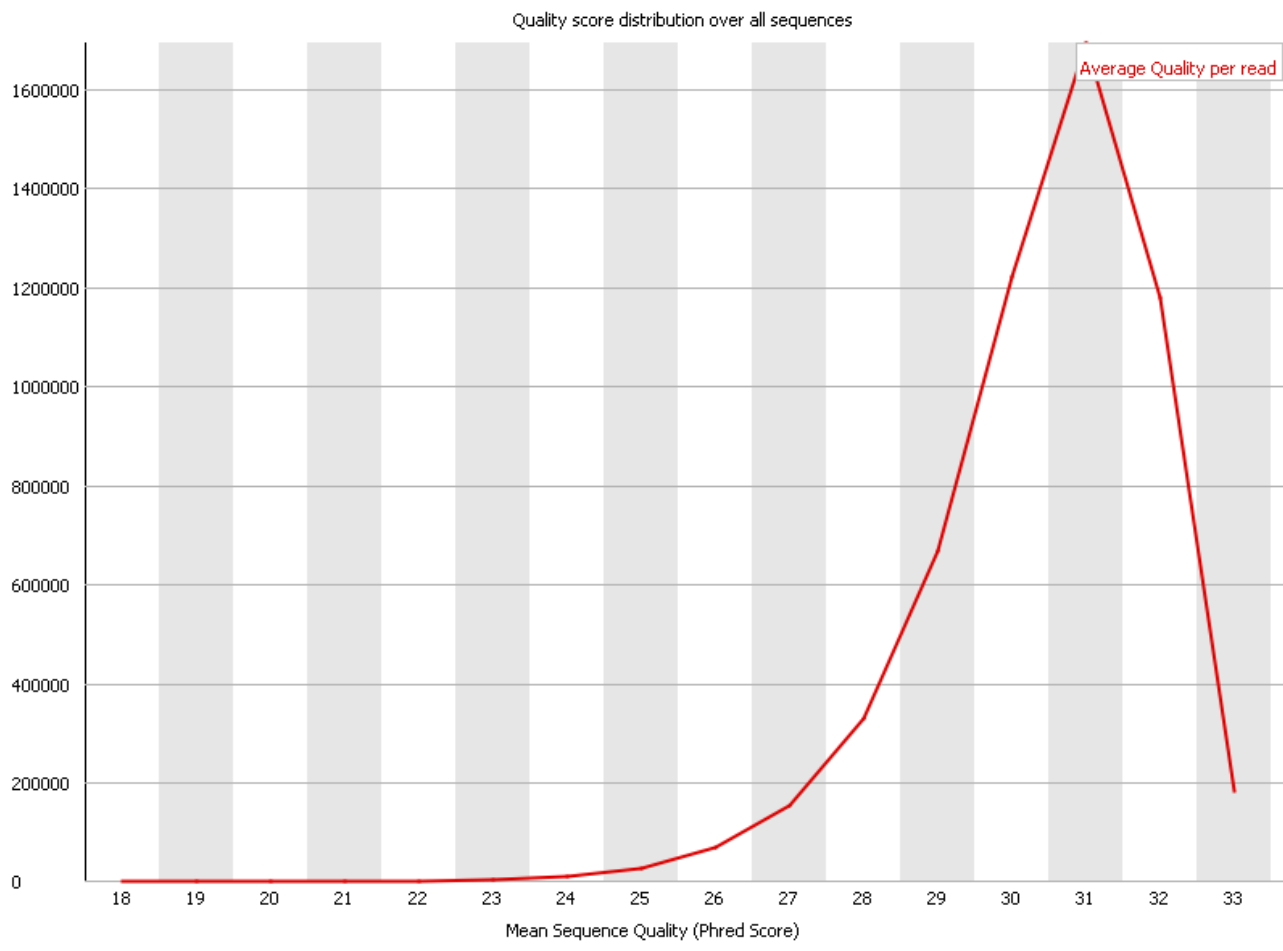

[Back to summary](#)

 Per base sequence content

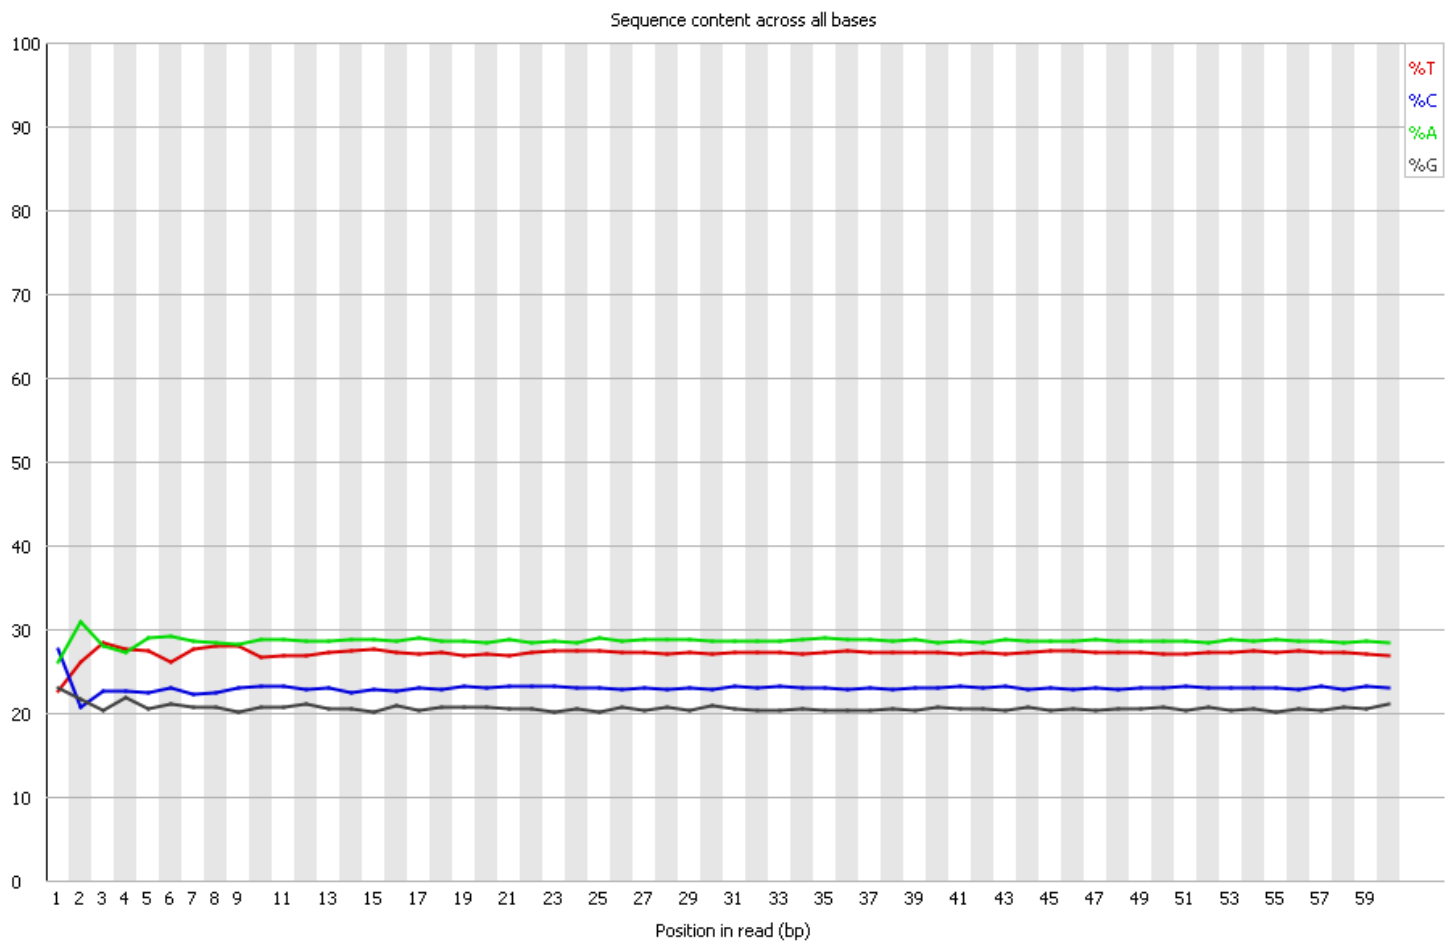

[Back to summary](#)

 Per base GC content

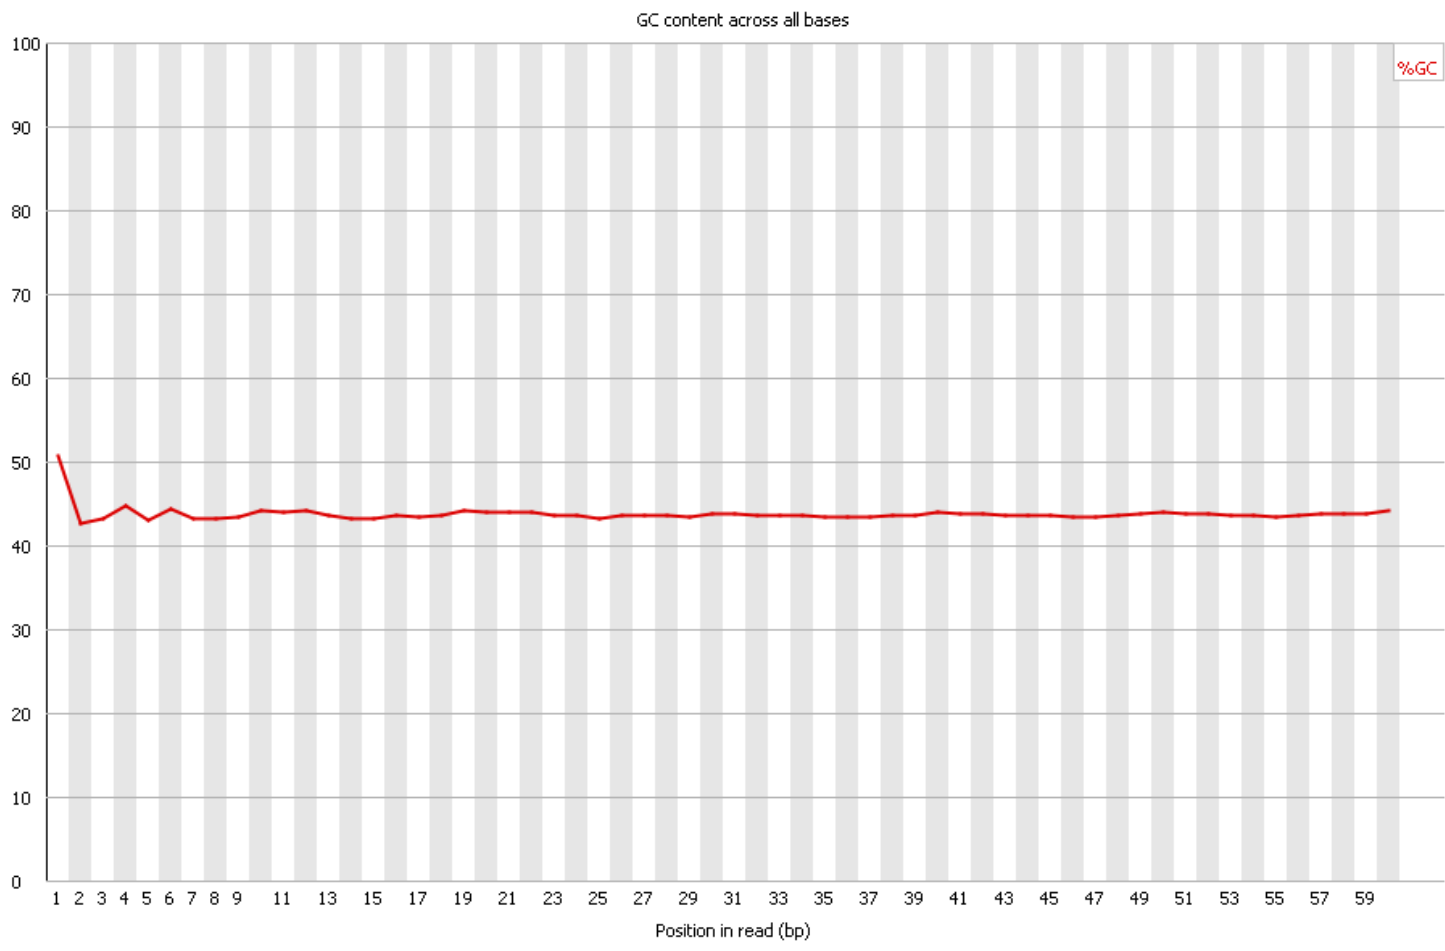

[Back to summary](#)

 Per sequence GC content

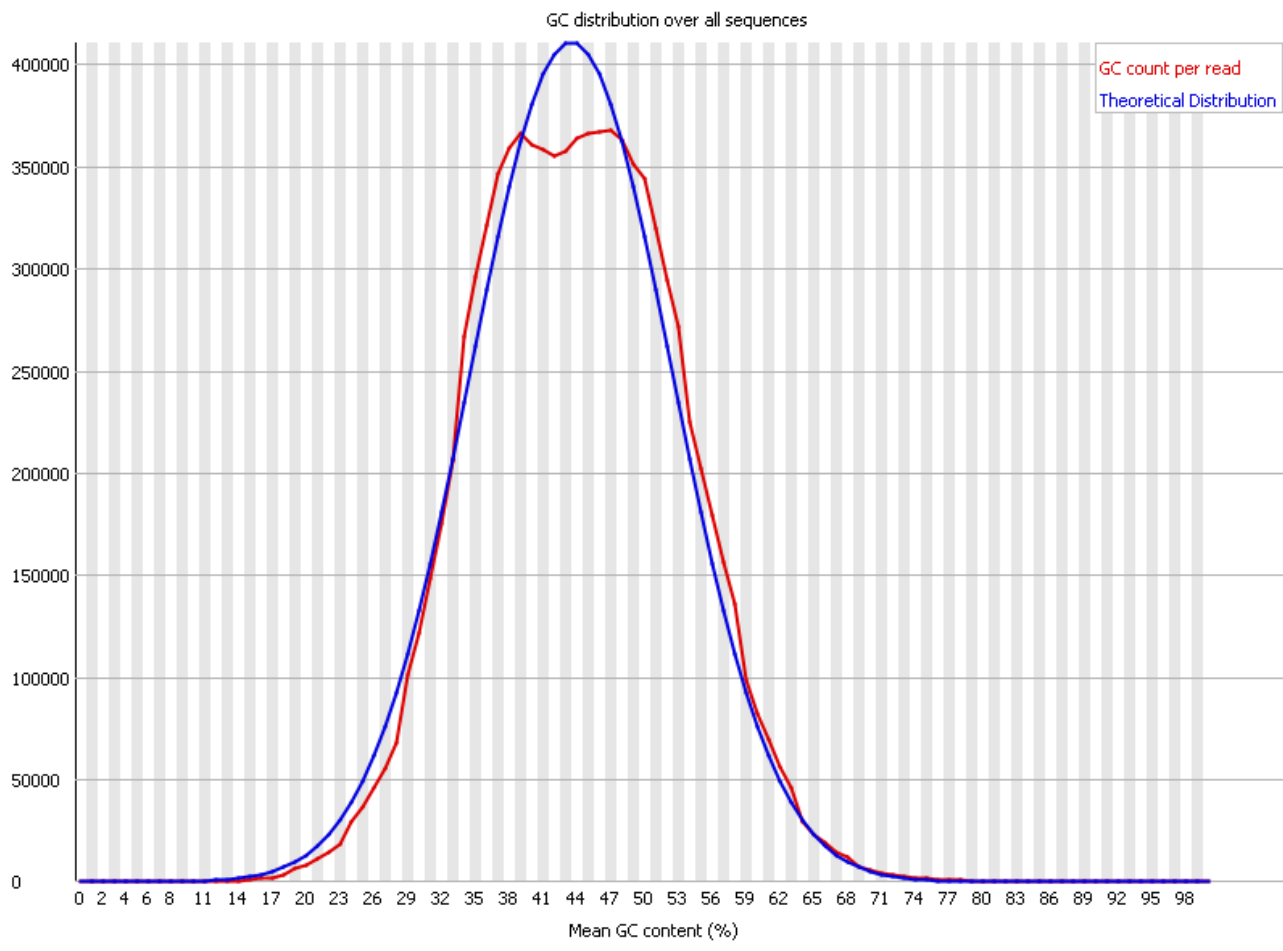

[Back to summary](#)

 Per base N content

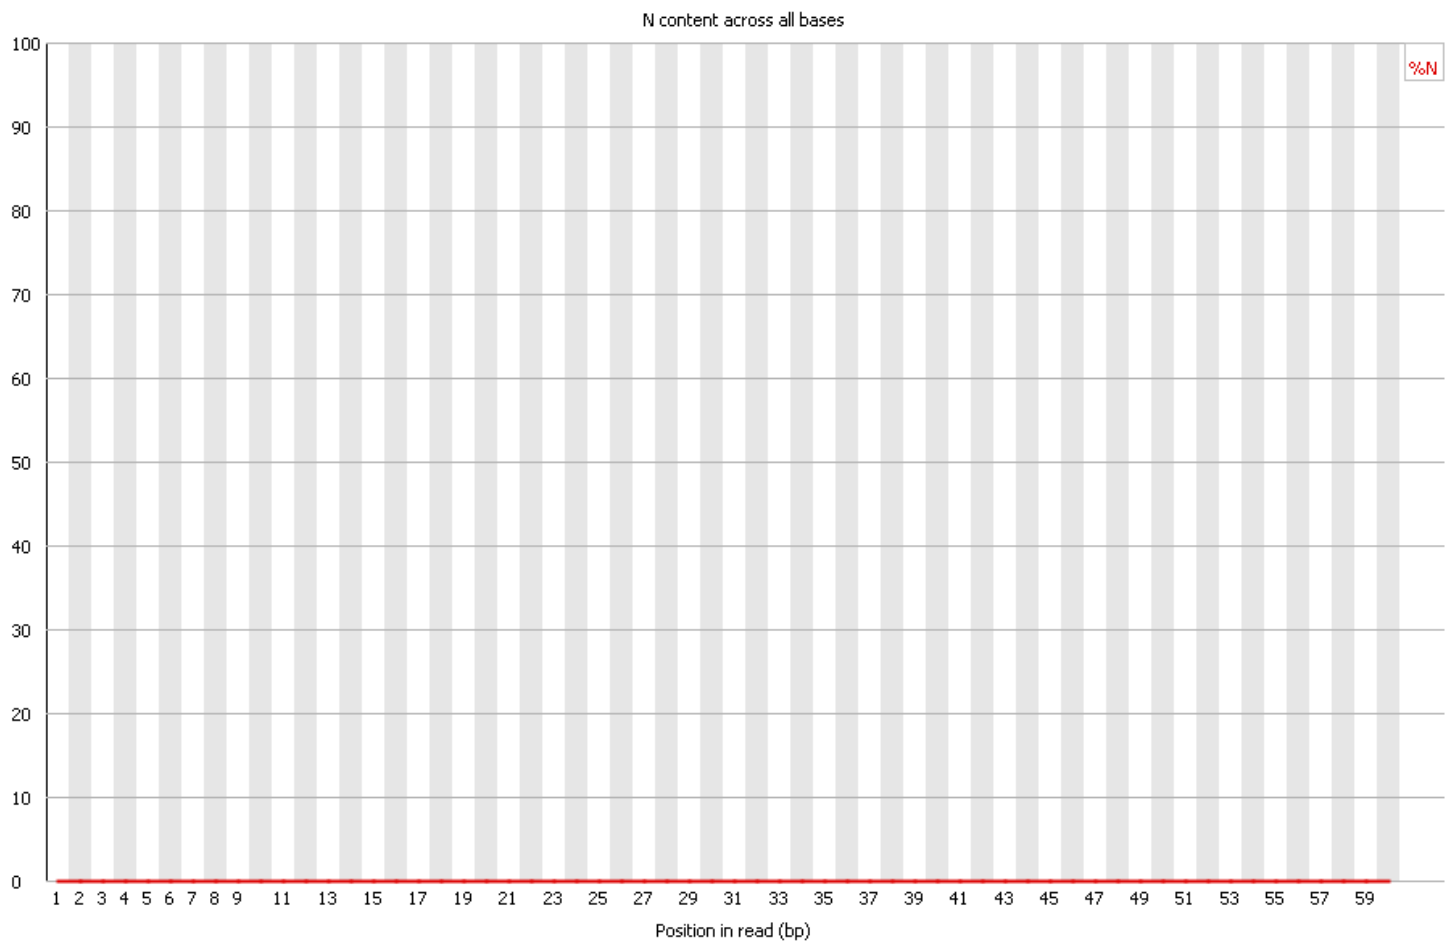

[Back to summary](#)

## Sequence Length Distribution

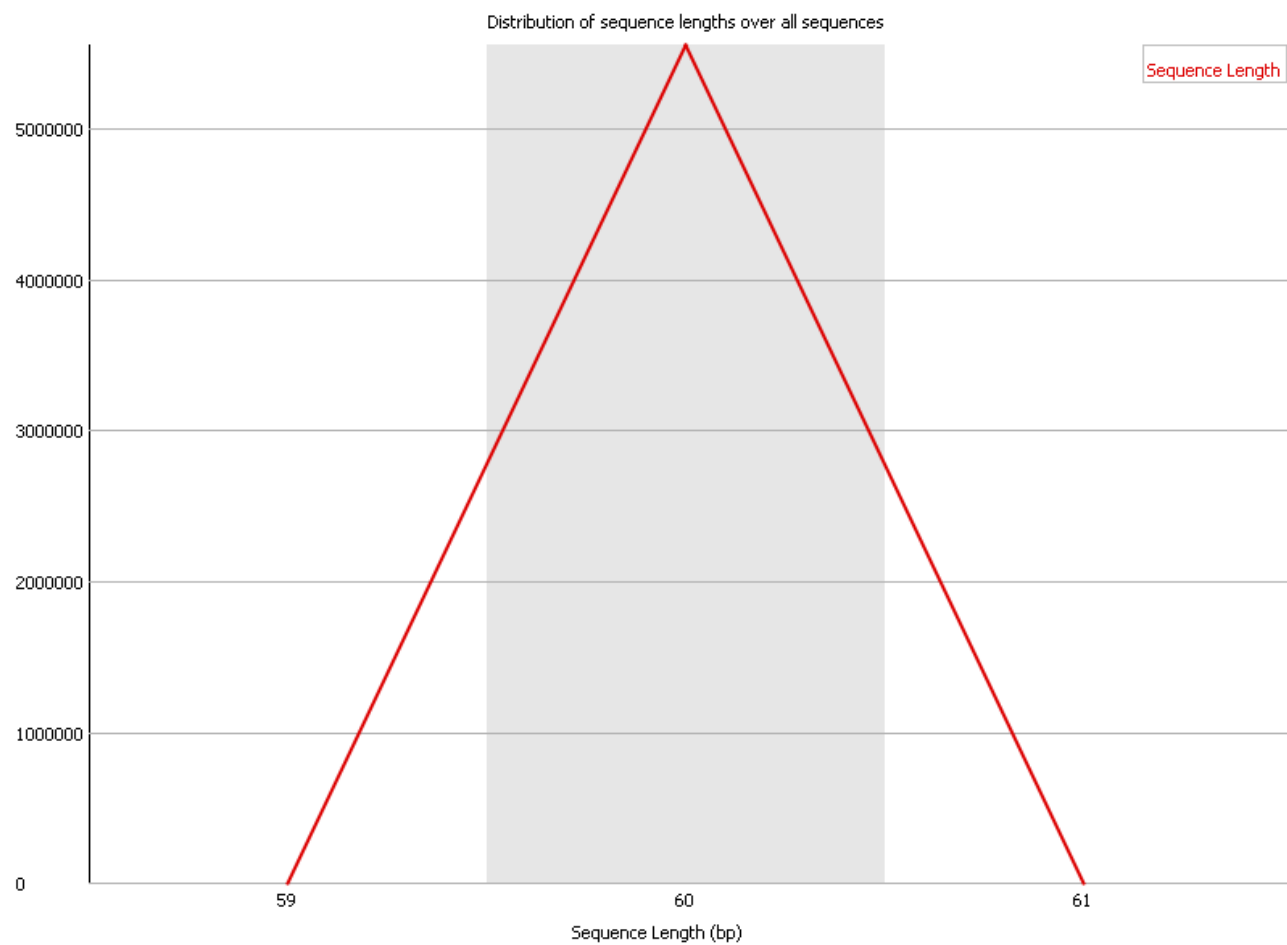

[Back to summary](#)

## ! Sequence Duplication Levels



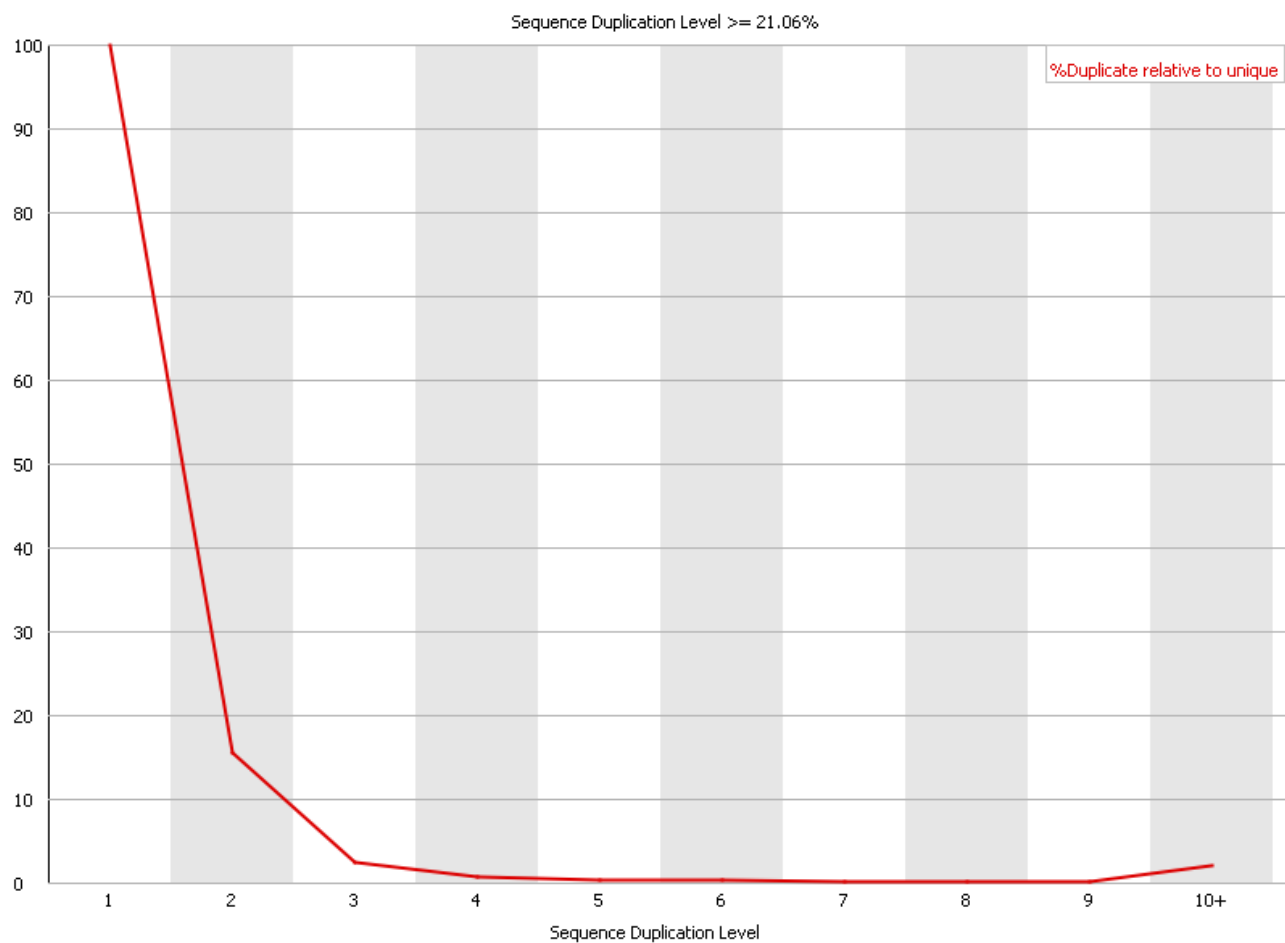

[Back to summary](#)

## Overrepresented sequences

No overrepresented sequences

[Back to summary](#)

## Kmer Content

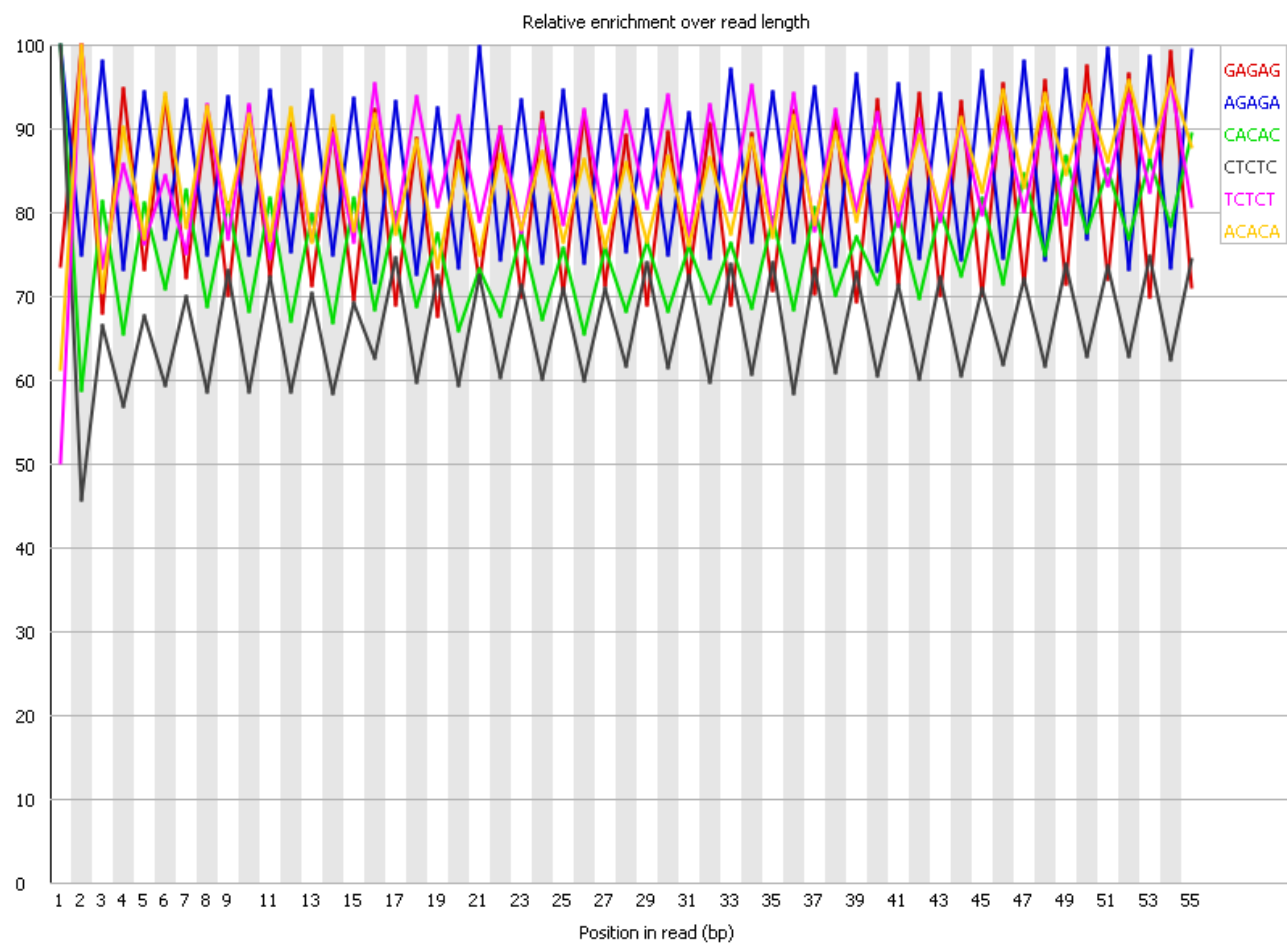

| Sequence | Count   | Obs/Exp Overall | Obs/Exp Max | Max Obs/Exp Position |
|----------|---------|-----------------|-------------|----------------------|
| GAGAG    | 1250695 | 5.548921        | 6.7970896   | 2                    |
| AGAGA    | 1445660 | 4.6301126       | 5.4237266   | 1                    |
| CACAC    | 1075935 | 3.4298215       | 4.5435925   | 1                    |
| CTCTC    | 969405  | 3.4188979       | 5.127703    | 1                    |
| TCTCT    | 1054250 | 3.1520834       | 3.7156014   | 2                    |
| ACACA    | 1204605 | 3.094964        | 3.6599352   | 2                    |

[Back to summary](#)
