# Supplementary material for: Dynamic Changes in Ezh2 Gene Occupancy Underlie Its Involvement in Neural Stem Cell Self-Renewal and Differentiation towards Oligodendrocytes
Source: PubMed Central journal article supplement (PMC3395718; doi:10.1371/journal.pone.0040399), 2012-07-12
Supplement: pone.0040399.s015.pdf [file pone.0040399.s015.pdf]

# FastQC Report

Wed 13 Jul 2011

ChIP-Seq-pOLs.fastqsanger

## Summary

-  [Basic Statistics](#)
-  [Per base sequence quality](#)
-  [Per sequence quality scores](#)
-  [Per base sequence content](#)
-  [Per base GC content](#)
-  [Per sequence GC content](#)
-  [Per base N content](#)
-  [Sequence Length Distribution](#)
-  [Sequence Duplication Levels](#)
-  [Overrepresented sequences](#)
-  [Kmer Content](#)

## Basic Statistics

| Measure         | Value                     |
|-----------------|---------------------------|
| Filename        | ChIP-Seq-pOLs.fastqsanger |
| File type       | Conventional base calls   |
| Encoding        | Sanger / Illumina 1.9     |
| Total Sequences | 5095659                   |
| Sequence length | 60                        |
| %GC             | 45                        |

[Back to summary](#)

## Per base sequence quality

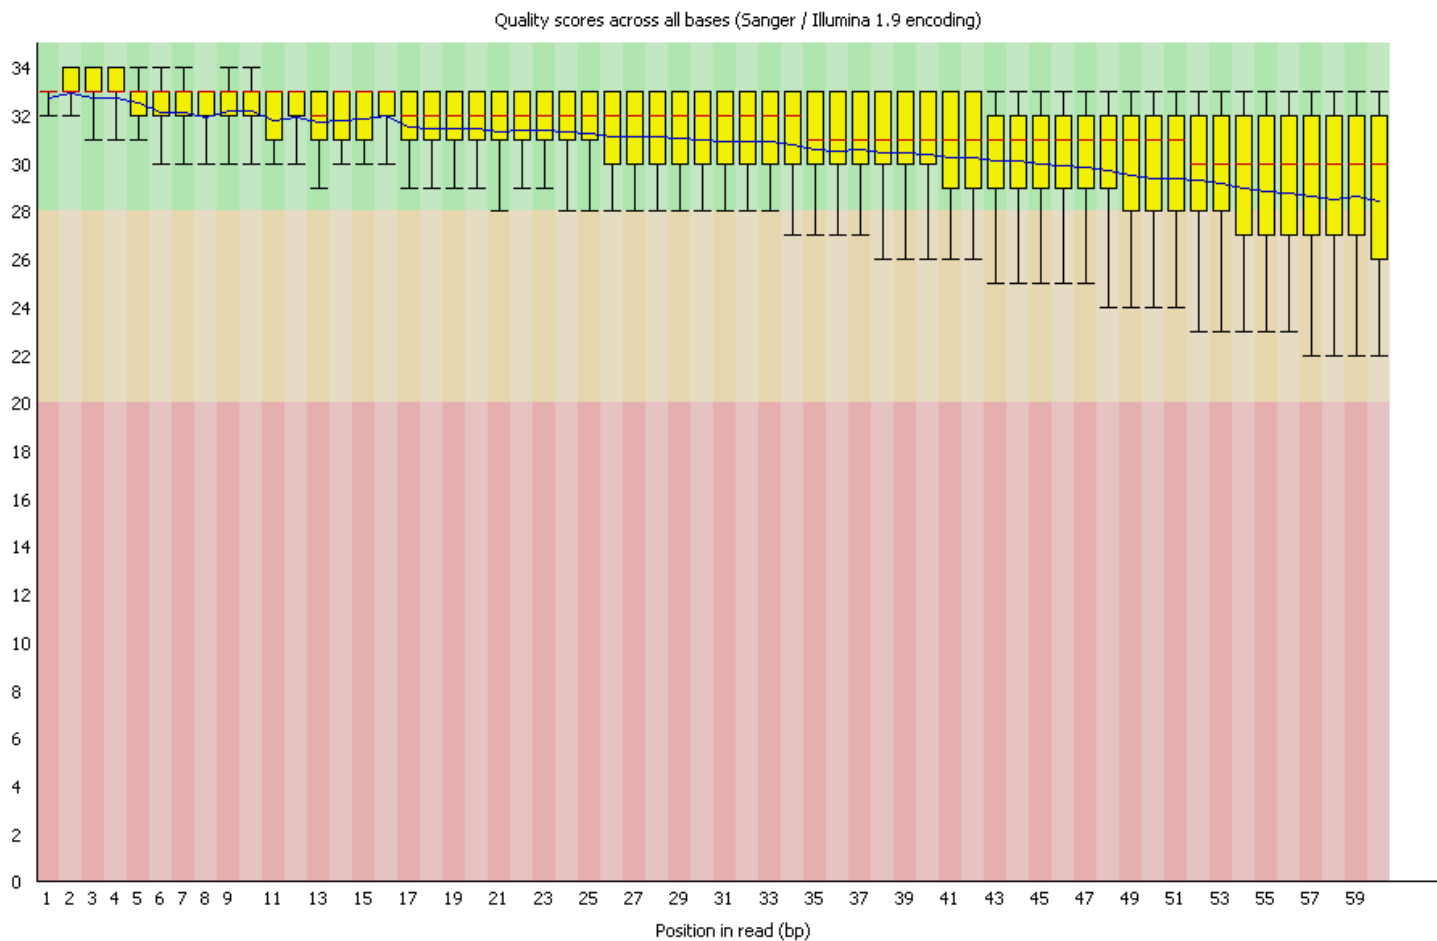

[Back to summary](#)

## Per sequence quality scores

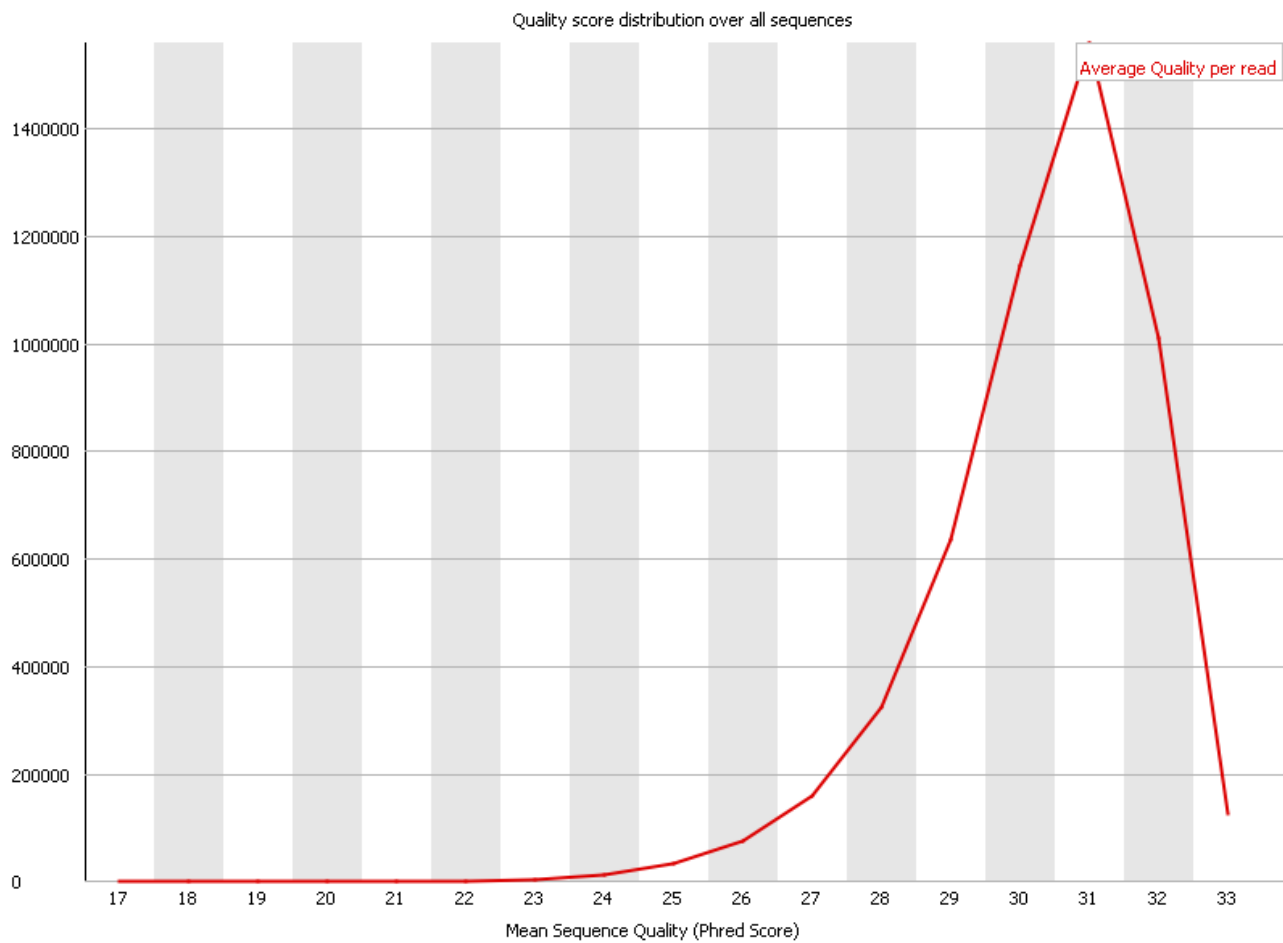

[Back to summary](#)

 Per base sequence content

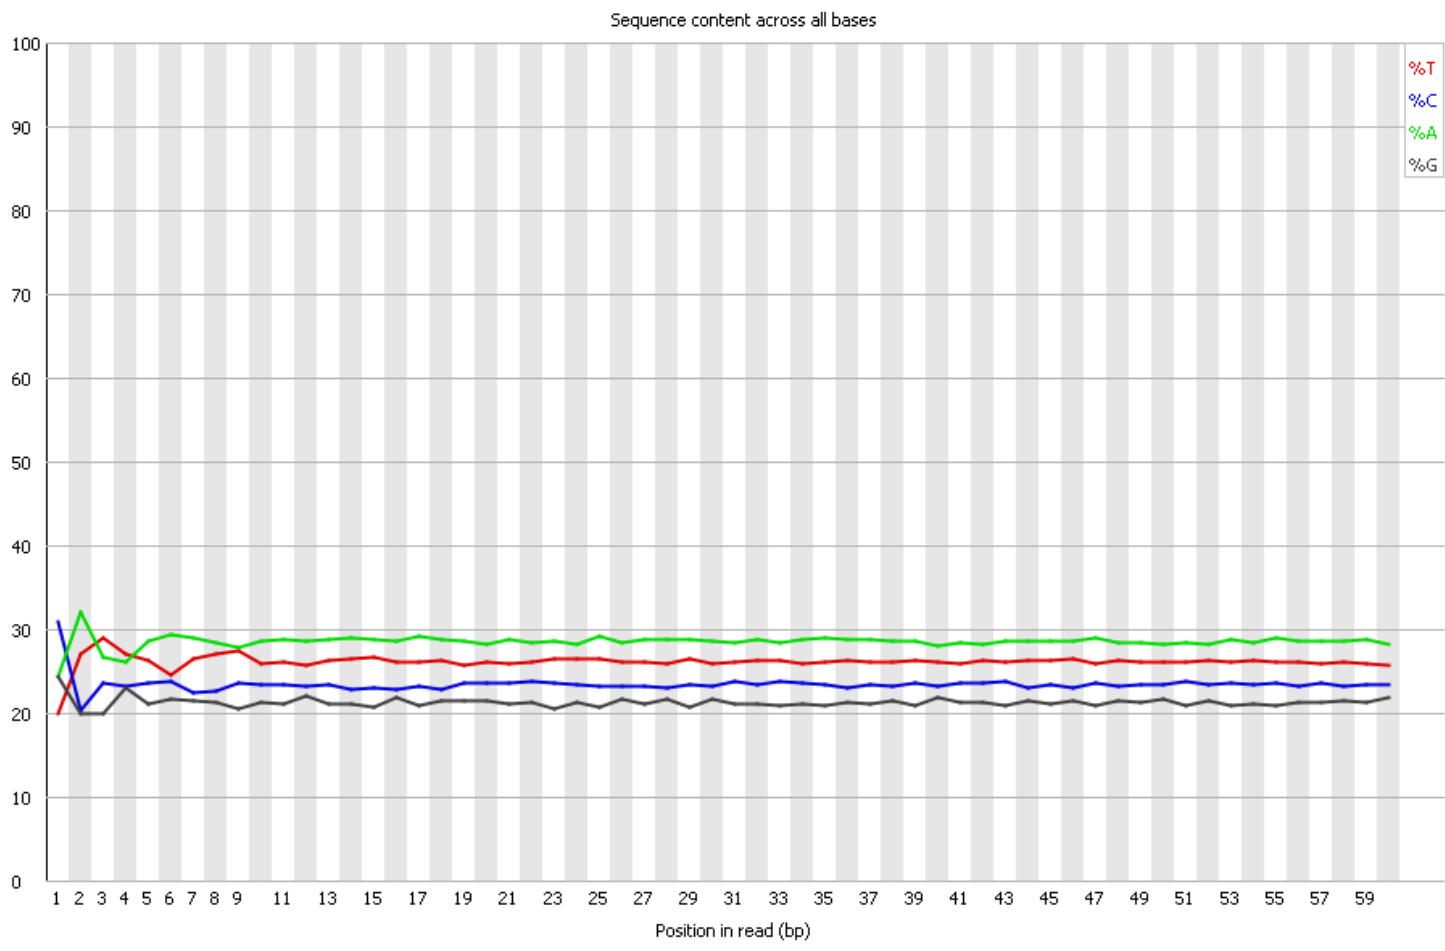

[Back to summary](#)

 Per base GC content

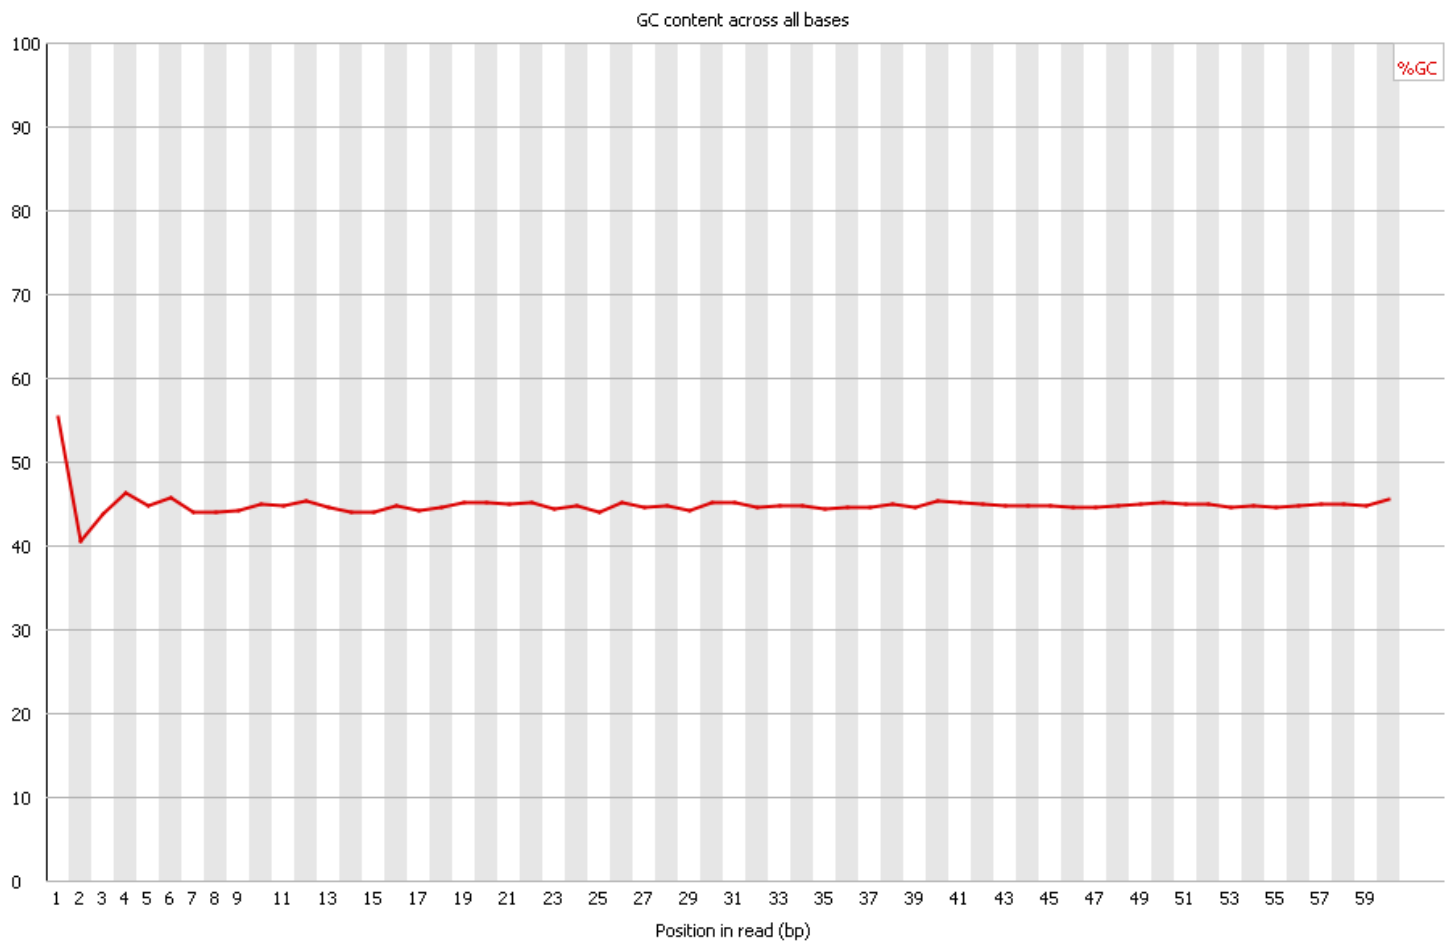

[Back to summary](#)

## ! Per sequence GC content

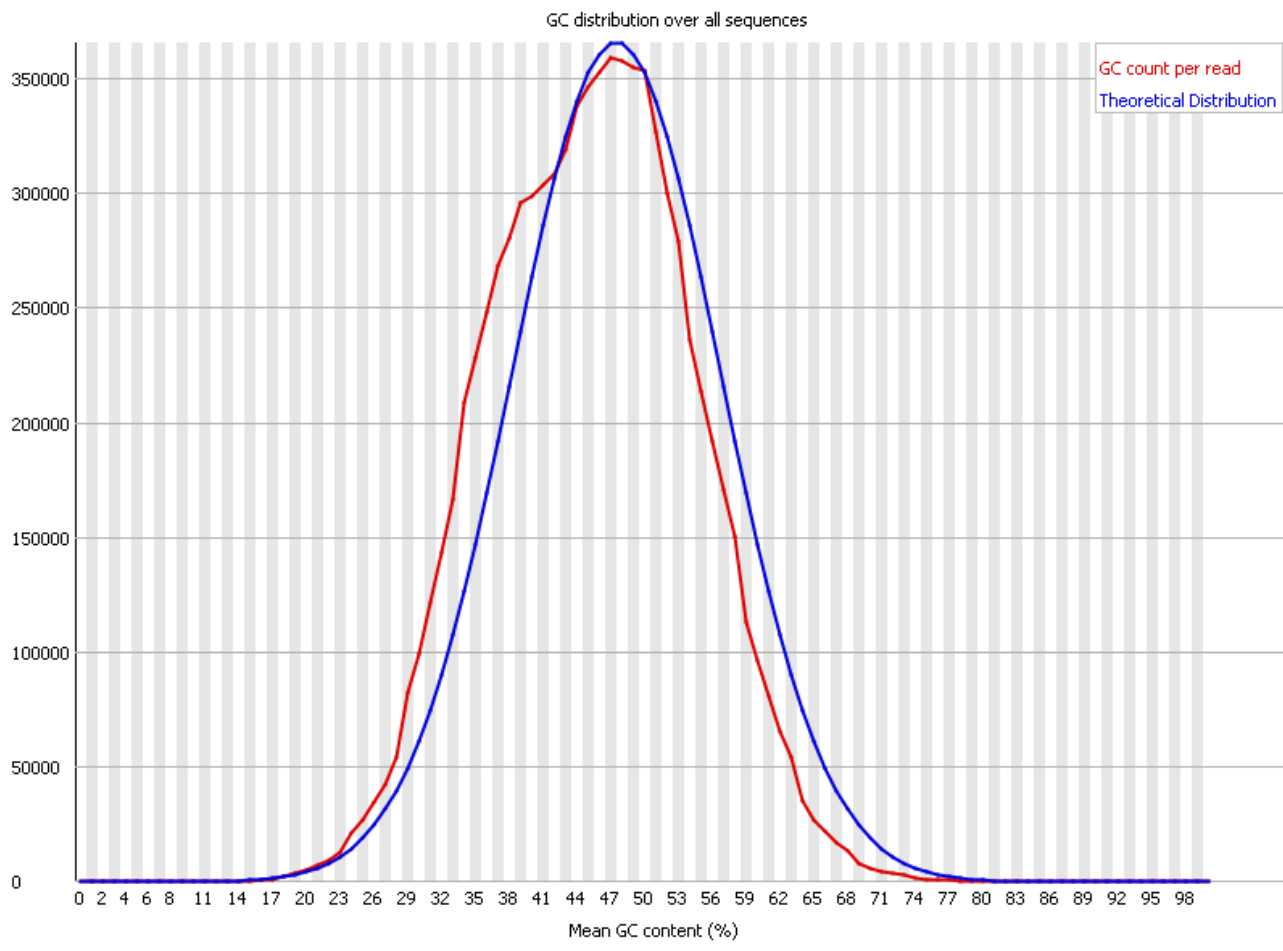

[Back to summary](#)

 Per base N content

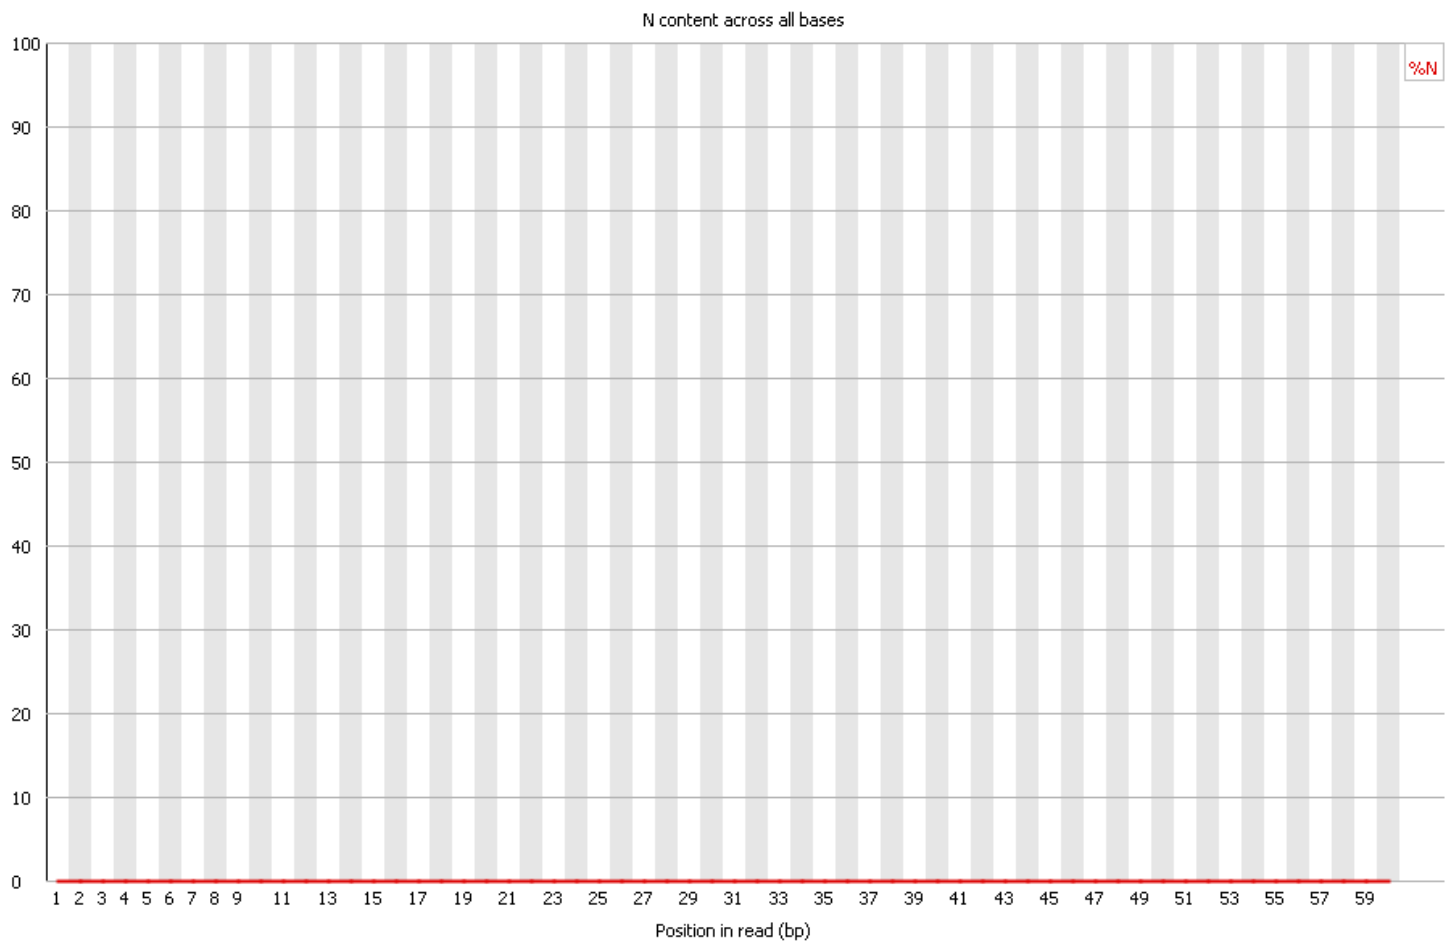

[Back to summary](#)

## Sequence Length Distribution

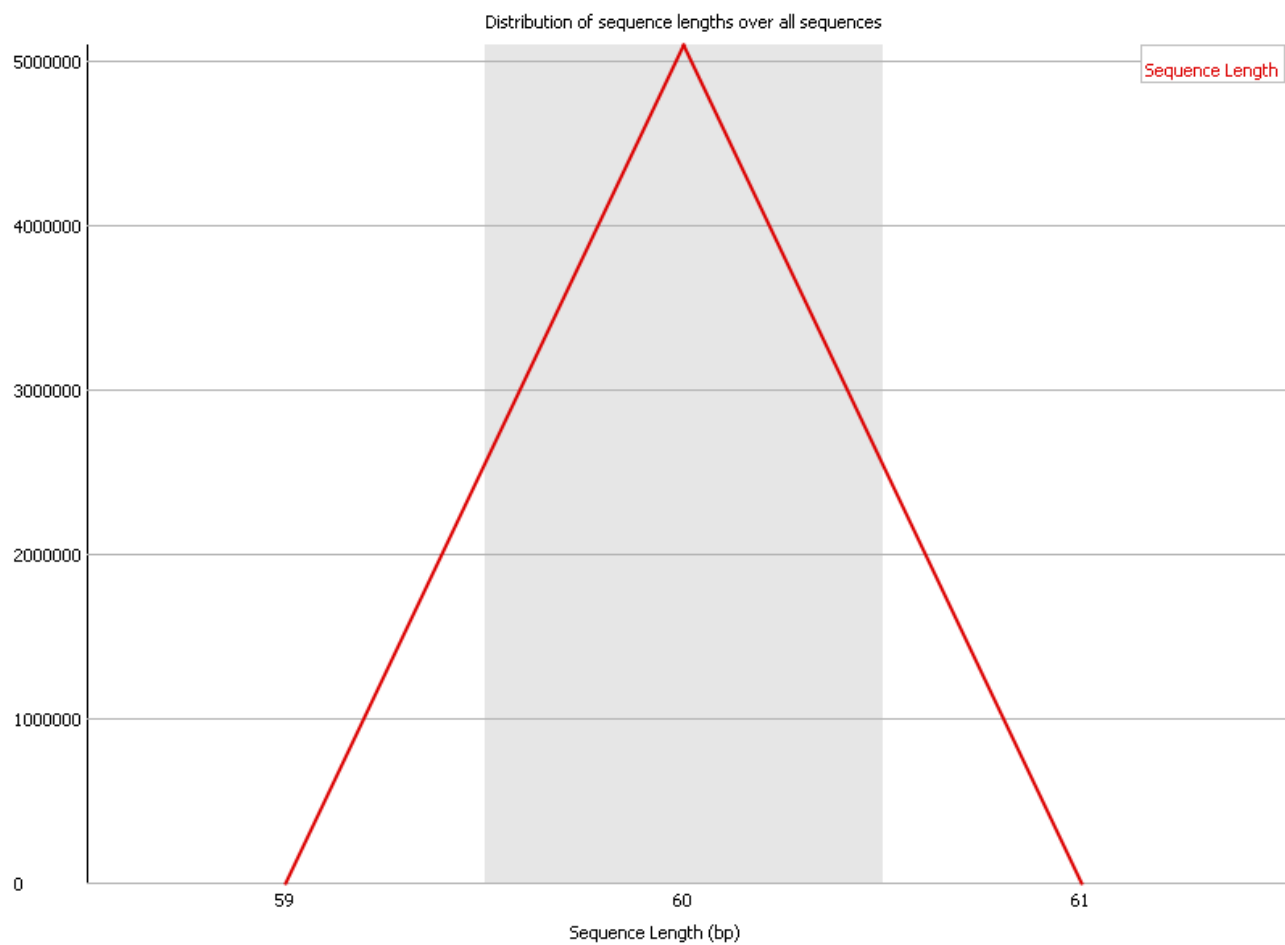

[Back to summary](#)

## ! Sequence Duplication Levels



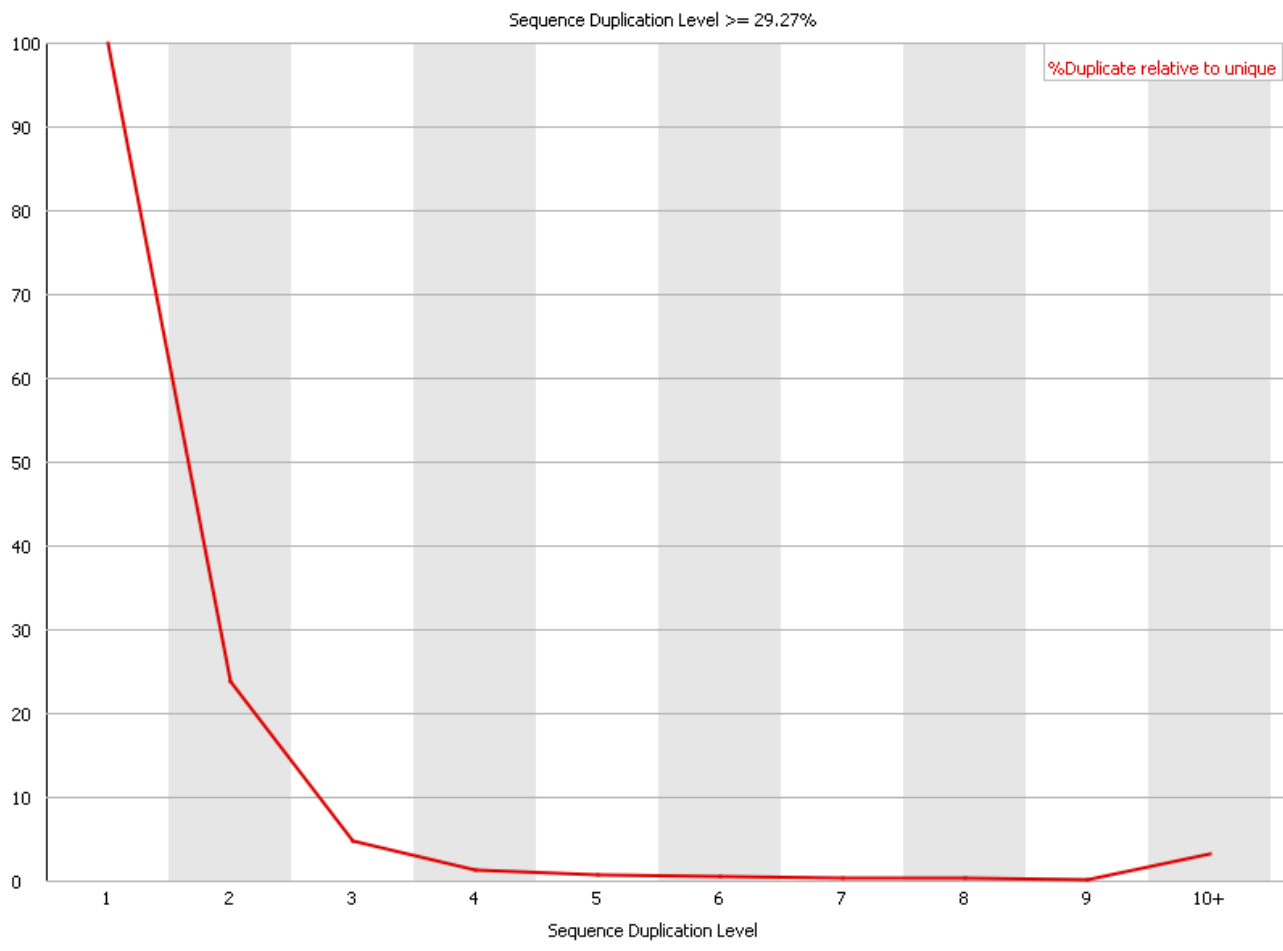

[Back to summary](#)

### Overrepresented sequences

No overrepresented sequences

[Back to summary](#)

### Kmer Content

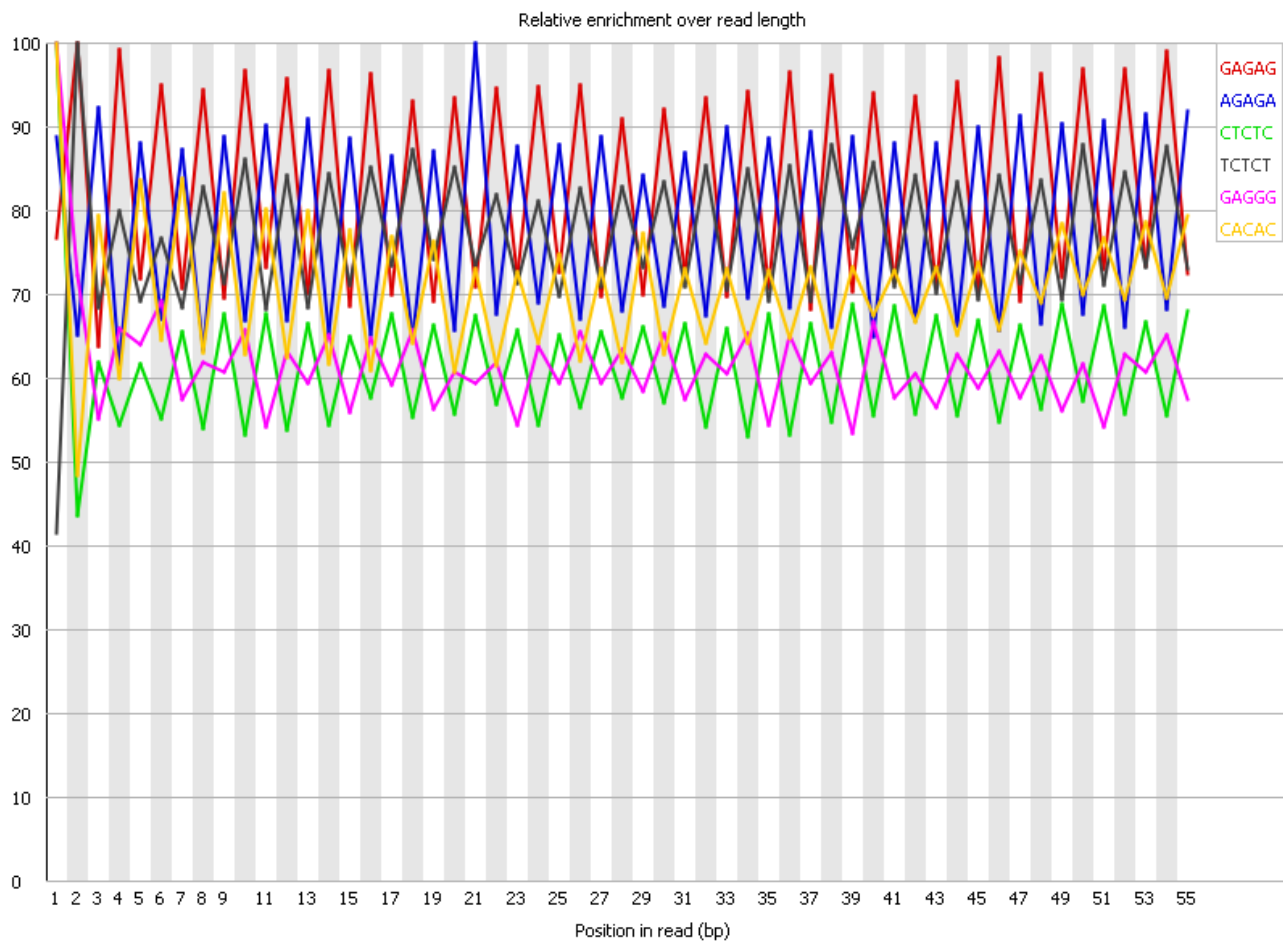

| Sequence | Count   | Obs/Exp Overall | Obs/Exp Max | Max Obs/Exp Position |
|----------|---------|-----------------|-------------|----------------------|
| GAGAG    | 1995480 | 8.804197        | 10.597129   | 2                    |
| AGAGA    | 2123230 | 6.993099        | 8.931539    | 21                   |
| CTCTC    | 1232670 | 4.842374        | 7.8667407   | 1                    |
| TCTCT    | 1243120 | 4.381121        | 5.6668015   | 2                    |
| GAGGG    | 612870  | 3.6222668       | 5.856107    | 1                    |
| CACAC    | 1097305 | 3.6217186       | 5.1173496   | 1                    |
| GGAGA    | 809570  | 3.5718794       | 4.114365    | 4                    |
| AGAGG    | 794160  | 3.5038893       | 3.9942465   | 27                   |
| GGGAG    | 574860  | 3.397615        | 4.344539    | 3                    |
| ACACA    | 1229790 | 3.337851        | 4.182797    | 2                    |
| GGAGG    | 556070  | 3.2865598       | 3.8211792   | 1                    |
| AGGAG    | 725135  | 3.1993463       | 4.121645    | 2                    |
| GAGGA    | 723495  | 3.1921103       | 4.417695    | 1                    |
| CTCTG    | 633585  | 2.7417934       | 6.119199    | 22                   |
| TGTTT    | 647720  | 2.255997        | 5.7210584   | 11                   |
| CTGGT    | 460675  | 2.196053        | 5.1323066   | 1                    |
| TCTGG    | 405640  | 1.9336994       | 5.327636    | 23                   |
| GTTTG    | 361110  | 1.5443594       | 5.646421    | 12                   |
| TGATG    | 391375  | 1.5342278       | 5.0311503   | 15                   |

[Back to summary](#)
